# Supplementary material
Source: PubMed Central journal article supplement (PMC5785937)
Supplement: NIHMS933848-supplement-supplement_1.pdf [file NIHMS933848-supplement-supplement_1.pdf]

**SUPPORTING TABLE 1.** Ovarian Cancer: Number of Cases Diagnosed Among Females Ages 15 to 99 Years by Stage at Diagnosis, Calendar Period, and US State (Grouped by US Census Region) Between 2001 and 2009<sup>a</sup>

|                           | SEER Summary<br>Stage 2000 | 2001-2003 |        |       | 2004-2009 |         |       |
|---------------------------|----------------------------|-----------|--------|-------|-----------|---------|-------|
|                           |                            | All Races | White  | Black | All Races | White   | Black |
| <b>UNITED STATES</b>      |                            |           |        |       |           |         |       |
|                           | No. of patients            | 56,390    | 49,893 | 4,262 | 116,459   | 101,717 | 9,440 |
|                           | Localized (%)              | 15.9      | 15.7   | 15.4  | 14.2      | 13.9    | 14.5  |
|                           | Regional (%)               | 18.9      | 18.9   | 16.4  | 18.9      | 19.0    | 15.7  |
|                           | Distant (%)                | 53.5      | 54.1   | 51.0  | 56.8      | 57.4    | 55.3  |
|                           | Unknown (%)                | 11.7      | 11.3   | 17.2  | 10.1      | 9.7     | 14.5  |
| <b>NORTHEAST</b>          |                            |           |        |       |           |         |       |
| <b>New England</b>        |                            |           |        |       |           |         |       |
| Connecticut<br>(SEER)     | No. of patients            | 964       | 914    | 34    | 1,921     | 1,778   | 92    |
|                           | Localized (%)              | 14.4      | 14.7   | 11.8  | 14.0      | 13.6    | 17.4  |
|                           | Regional (%)               | 18.6      | 18.8   | 20.6  | 22.1      | 21.8    | 23.9  |
|                           | Distant (%)                | 61.4      | 60.8   | 64.7  | 59.8      | 60.6    | 56.5  |
|                           | Unknown (%)                | 5.6       | 5.7    | 2.9   | 4.2       | 4.0     | 2.2   |
| Massachusetts<br>(NPCR)   | No. of patients            | 1,836     | 1,749  | 45    | 3,602     | 3,406   | 98    |
|                           | Localized (%)              | 13.9      | 13.8   | 8.9   | 14.6      | 14.3    | 19.4  |
|                           | Regional (%)               | 20.4      | 20.4   | 15.6  | 22.5      | 22.3    | 17.3  |
|                           | Distant (%)                | 58.9      | 58.9   | 68.9  | 57.0      | 57.5    | 57.1  |
|                           | Unknown (%)                | 6.8       | 6.9    | 6.7   | 5.9       | 5.9     | 6.1   |
| New Hampshire<br>(NPCR)   | No. of patients            | 320       | 310    | -     | 709       | 689     | -     |
|                           | Localized (%)              | 19.1      | 19.7   | 0.0   | 15.2      | 15.2    | 0.0   |
|                           | Regional (%)               | 24.1      | 24.5   | 0.0   | 21.7      | 22.1    | 0.0   |
|                           | Distant (%)                | 42.5      | 41.6   | 100.0 | 56.3      | 57.5    | 100.0 |
|                           | Unknown (%)                | 14.4      | 14.2   | 0.0   | 6.8       | 5.2     | 0.0   |
| Rhode Island<br>(NPCR)    | No. of patients            | 252       | 239    | -     | 463       | 431     | 14    |
|                           | Localized (%)              | 24.2      | 23.8   | 25.0  | -         | -       | -     |
|                           | Regional (%)               | 14.7      | 15.1   | 12.5  | -         | -       | -     |
|                           | Distant (%)                | 55.6      | 55.6   | 62.5  | -         | -       | -     |
|                           | Unknown (%)                | 5.6       | 5.4    | 0.0   | -         | -       | -     |
| <b>Mid Atlantic</b>       |                            |           |        |       |           |         |       |
| New Jersey<br>(NPCR/SEER) | No. of patients            | 2,557     | 2,255  | 211   | 4,780     | 4,145   | 433   |
|                           | Localized (%)              | 15.9      | 15.6   | 17.5  | 15.3      | 14.9    | 18.0  |
|                           | Regional (%)               | 17.5      | 17.6   | 15.2  | 19.0      | 19.1    | 15.2  |
|                           | Distant (%)                | 57.4      | 58.2   | 56.9  | 57.4      | 58.1    | 54.7  |
|                           | Unknown (%)                | 9.2       | 8.7    | 10.4  | 8.3       | 7.9     | 12.0  |
| New York<br>(NPCR)        | No. of patients            | 5,323     | 4,566  | 543   | 10,463    | 8,797   | 1,132 |
|                           | Localized (%)              | 17.2      | 16.8   | 17.7  | 16.0      | 15.3    | 16.8  |
|                           | Regional (%)               | 21.4      | 21.4   | 19.5  | 19.6      | 19.7    | 17.8  |
|                           | Distant (%)                | 47.5      | 47.9   | 47.5  | 56.8      | 57.5    | 57.5  |
|                           | Unknown (%)                | 13.8      | 13.8   | 15.3  | 7.6       | 7.5     | 7.9   |
| Pennsylvania<br>(NPCR)    | No. of patients            | 3,750     | 3,465  | 205   | 7,456     | 6,856   | 475   |
|                           | Localized (%)              | 17.5      | 17.3   | 16.6  | 14.0      | 13.9    | 13.7  |
|                           | Regional (%)               | 20.0      | 20.2   | 17.1  | 20.0      | 20.1    | 18.7  |
|                           | Distant (%)                | 53.0      | 53.0   | 56.1  | 59.1      | 59.3    | 59.4  |
|                           | Unknown (%)                | 9.5       | 9.5    | 10.2  | 6.8       | 6.7     | 8.2   |
| <b>SOUTH</b>              |                            |           |        |       |           |         |       |
| <b>South Atlantic</b>     |                            |           |        |       |           |         |       |
| Delaware<br>(NPCR)        | No. of patients            | 208       | 175    | 27    | 433       | 369     | 50    |
|                           | Localized (%)              | 16.3      | 17.1   | 14.8  | 9.5       | 9.8     | 6.0   |
|                           | Regional (%)               | 23.1      | 23.4   | 22.2  | 20.3      | 20.6    | 18.0  |
|                           | Distant (%)                | 50.5      | 49.1   | 51.9  | 64.7      | 64.2    | 68.0  |
|                           | Unknown (%)                | 10.1      | 10.3   | 11.1  | 5.5       | 5.4     | 8.0   |
| Florida<br>(NPCR)         | No. of patients            | 4,889     | 4,433  | 380   | 9,766     | 8,771   | 769   |
|                           | Localized (%)              | 14.6      | 14.6   | 12.4  | 12.7      | 12.6    | 13.7  |
|                           | Regional (%)               | 15.7      | 15.7   | 15.3  | 17.6      | 17.6    | 16.6  |
|                           | Distant (%)                | 58.3      | 58.7   | 55.5  | 60.3      | 60.8    | 57.9  |
|                           | Unknown (%)                | 11.5      | 11.0   | 16.8  | 9.3       | 9.0     | 11.8  |
| Georgia<br>(NPCR/SEER)    | No. of patients            | 1,829     | 1,437  | 365   | 3,965     | 3,085   | 797   |
|                           | Localized (%)              | 14.7      | 14.3   | 15.9  | 15.2      | 14.5    | 17.3  |
|                           | Regional (%)               | 18.2      | 18.0   | 18.1  | 18.9      | 20.0    | 14.6  |
|                           | Distant (%)                | 57.6      | 58.0   | 57.0  | 59.3      | 59.4    | 60.5  |
|                           | Unknown (%)                | 9.6       | 9.7    | 9.0   | 6.6       | 6.1     | 7.7   |

SUPPORTING TABLE 1. *Continued*

| SEER Summary<br>Stage 2000 |                 | 2001-2003 |       |       | 2004-2009 |       |       |
|----------------------------|-----------------|-----------|-------|-------|-----------|-------|-------|
|                            |                 | All Races | White | Black | All Races | White | Black |
| Maryland<br>(NPCR)         | No. of patients | 1,143     | 909   | 196   | 2,368     | 1,791 | 469   |
|                            | Localized (%)   | -         | -     | -     | -         | -     | -     |
|                            | Regional (%)    | -         | -     | -     | -         | -     | -     |
|                            | Distant (%)     | -         | -     | -     | -         | -     | -     |
|                            | Unknown (%)     | -         | -     | -     | -         | -     | -     |
| North Carolina<br>(NPCR)   | No. of patients | 1,939     | 1,642 | 263   | 4,180     | 3,501 | 598   |
|                            | Localized (%)   | 20.4      | 19.5  | 25.5  | 14.4      | 14.1  | 16.7  |
|                            | Regional (%)    | 21.6      | 22.4  | 16.7  | 20.6      | 21.1  | 17.2  |
|                            | Distant (%)     | 49.2      | 49.6  | 47.1  | 58.3      | 58.7  | 57.4  |
|                            | Unknown (%)     | 8.8       | 8.4   | 10.6  | 6.6       | 6.1   | 8.7   |
| South Carolina<br>(NPCR)   | No. of patients | 991       | 789   | 187   | 1,946     | 1,546 | 375   |
|                            | Localized (%)   | 17.8      | 18.0  | 17.1  | 15.8      | 16.0  | 15.2  |
|                            | Regional (%)    | 19.0      | 20.0  | 15.0  | 18.1      | 18.8  | 15.2  |
|                            | Distant (%)     | 51.3      | 51.8  | 49.2  | 57.8      | 58.5  | 55.5  |
|                            | Unknown (%)     | 12.0      | 10.1  | 18.7  | 8.2       | 6.7   | 14.1  |
| West Virginia<br>(NPCR)    | No. of patients | 563       | 546   | 15    | 974       | 949   | 16    |
|                            | Localized (%)   | 18.5      | 18.5  | 20.0  | 12.7      | 12.8  | 18.8  |
|                            | Regional (%)    | 21.1      | 21.4  | 13.3  | 18.9      | 18.9  | 18.8  |
|                            | Distant (%)     | 46.9      | 46.9  | 40.0  | 57.1      | 57.2  | 50.0  |
|                            | Unknown (%)     | 13.5      | 13.2  | 26.7  | 11.3      | 11.2  | 12.5  |
| <b>East South Central</b>  |                 |           |       |       |           |       |       |
| Alabama<br>(NPCR)          | No. of patients | 1,076     | 875   | 188   | 2,274     | 1,869 | 383   |
|                            | Localized (%)   | 17.5      | 17.7  | 14.4  | 14.4      | 13.6  | 17.8  |
|                            | Regional (%)    | 20.1      | 21.0  | 16.5  | 19.0      | 19.9  | 14.6  |
|                            | Distant (%)     | 54.8      | 55.1  | 55.9  | 60.7      | 61.2  | 59.3  |
|                            | Unknown (%)     | 7.6       | 6.2   | 13.3  | 5.8       | 5.3   | 8.4   |
| Kentucky<br>(NPCR/SEER)    | No. of patients | 987       | 939   | 44    | 2,092     | 2,011 | 66    |
|                            | Localized (%)   | 13.2      | 13.2  | 13.6  | 16.0      | 15.9  | 18.2  |
|                            | Regional (%)    | 20.1      | 20.2  | 18.2  | 20.7      | 20.6  | 21.2  |
|                            | Distant (%)     | 56.2      | 56.3  | 56.8  | 55.7      | 56.1  | 47.0  |
|                            | Unknown (%)     | 10.5      | 10.2  | 11.4  | 7.6       | 7.4   | 13.6  |
| Mississippi<br>(NPCR)      | No. of patients | 184       | 131   | 50    | 1,143     | 858   | 271   |
|                            | Localized (%)   | 17.4      | 16.8  | 20.0  | 14.6      | 14.0  | 16.2  |
|                            | Regional (%)    | 15.2      | 14.5  | 16.0  | 20.2      | 21.0  | 18.1  |
|                            | Distant (%)     | 51.6      | 51.9  | 50.0  | 58.1      | 58.4  | 57.2  |
|                            | Unknown (%)     | 15.8      | 16.8  | 14.0  | 7.1       | 6.6   | 8.5   |
| Tennessee<br>(NPCR)        | No. of patients | 414       | 365   | 45    | 2,699     | 2,382 | 278   |
|                            | Localized (%)   | 16.9      | 17.0  | 15.6  | 17.3      | 17.6  | 14.0  |
|                            | Regional (%)    | 26.8      | 27.1  | 24.4  | 20.6      | 20.4  | 21.2  |
|                            | Distant (%)     | 47.6      | 47.7  | 46.7  | 55.4      | 55.1  | 59.4  |
|                            | Unknown (%)     | 8.7       | 8.2   | 13.3  | 6.7       | 6.8   | 5.4   |
| <b>West South Central</b>  |                 |           |       |       |           |       |       |
| Louisiana<br>(NPCR/SEER)   | No. of patients | 950       | 718   | 224   | 1,749     | 1,344 | 387   |
|                            | Localized (%)   | 12.8      | 13.0  | 12.1  | 13.4      | 13.5  | 13.7  |
|                            | Regional (%)    | 17.9      | 17.5  | 18.8  | 19.5      | 19.6  | 18.3  |
|                            | Distant (%)     | 61.9      | 61.8  | 62.5  | 61.5      | 61.5  | 61.8  |
|                            | Unknown (%)     | 7.4       | 7.7   | 6.7   | 5.5       | 5.4   | 6.2   |
| Oklahoma<br>(NPCR)         | No. of patients | 920       | 795   | 44    | 1,703     | 1,451 | 70    |
|                            | Localized (%)   | 16.5      | 15.6  | 11.4  | 13.2      | 13.3  | 11.4  |
|                            | Regional (%)    | 25.2      | 25.8  | 25.0  | 17.9      | 17.8  | 17.1  |
|                            | Distant (%)     | 47.1      | 47.0  | 52.3  | 57.7      | 57.8  | 60.0  |
|                            | Unknown (%)     | 11.2      | 11.6  | 11.4  | 11.3      | 11.0  | 11.4  |
| Texas<br>(NPCR)            | No. of patients | 3,829     | 3,412 | 331   | 8,132     | 7,166 | 704   |
|                            | Localized (%)   | 16.8      | 16.7  | 14.5  | 14.1      | 13.9  | 13.1  |
|                            | Regional (%)    | 16.9      | 17.2  | 13.3  | 15.8      | 15.9  | 14.6  |
|                            | Distant (%)     | 51.2      | 51.5  | 52.3  | 58.7      | 59.1  | 58.5  |
|                            | Unknown (%)     | 15.0      | 14.6  | 19.9  | 11.5      | 11.1  | 13.8  |
| <b>MIDWEST</b>             |                 |           |       |       |           |       |       |
| <b>East North Central</b>  |                 |           |       |       |           |       |       |
| Michigan<br>(NPCR/SEER)    | No. of patients | 2,545     | 2,266 | 225   | 5,034     | 4,418 | 473   |
|                            | Localized (%)   | 16.8      | 16.5  | 19.6  | 14.7      | 14.4  | 15.4  |
|                            | Regional (%)    | 19.8      | 20.3  | 15.1  | 19.6      | 20.2  | 15.6  |
|                            | Distant (%)     | 51.9      | 51.9  | 54.2  | 48.9      | 49.1  | 48.0  |
|                            | Unknown (%)     | 11.5      | 11.3  | 11.1  | 16.7      | 16.3  | 20.9  |

**SUPPORTING TABLE 1.** *Continued*

| SEER Summary<br>Stage 2000 |                 | 2001-2003 |       |       | 2004-2009 |        |       |
|----------------------------|-----------------|-----------|-------|-------|-----------|--------|-------|
|                            |                 | All Races | White | Black | All Races | White  | Black |
| Ohio<br>(NPCR)             | No. of patients | 2,790     | 2,542 | 193   | 5,714     | 5,158  | 448   |
|                            | Localized (%)   | 19.5      | 19.7  | 14.5  | 15.0      | 14.6   | 16.1  |
|                            | Regional (%)    | 24.5      | 24.5  | 23.8  | 18.9      | 19.1   | 14.7  |
|                            | Distant (%)     | 40.3      | 40.4  | 39.9  | 56.1      | 56.3   | 57.4  |
|                            | Unknown (%)     | 15.8      | 15.4  | 21.8  | 10.0      | 10.0   | 11.8  |
| Wisconsin<br>(NPCR)        | No. of patients | 1,474     | 1,414 | 38    | 2,973     | 2,819  | 90    |
|                            | Localized (%)   | -         | -     | -     | -         | -      | -     |
|                            | Regional (%)    | -         | -     | -     | -         | -      | -     |
|                            | Distant (%)     | -         | -     | -     | -         | -      | -     |
|                            | Unknown (%)     | -         | -     | -     | -         | -      | -     |
| <b>West North Central</b>  |                 |           |       |       |           |        |       |
| Iowa<br>(SEER)             | No. of patients | 862       | 843   | -     | 1,685     | 1,652  | 14    |
|                            | Localized (%)   | 14.3      | 14.1  | 25.0  | 13.9      | 13.7   | 21.4  |
|                            | Regional (%)    | 19.0      | 19.0  | 12.5  | 19.5      | 19.5   | 7.1   |
|                            | Distant (%)     | 58.7      | 58.8  | 62.5  | 59.8      | 59.8   | 71.4  |
|                            | Unknown (%)     | 8.0       | 8.1   | 0.0   | 6.9       | 7.0    | 0.0   |
| Nebraska<br>(NPCR)         | No. of patients | 473       | 461   | -     | 956       | 929    | 14    |
|                            | Localized (%)   | 16.9      | 16.9  | 12.5  | 12.7      | 12.9   | 7.1   |
|                            | Regional (%)    | 18.2      | 18.2  | 12.5  | 21.7      | 22.0   | 7.1   |
|                            | Distant (%)     | 54.1      | 54.9  | 25.0  | 57.1      | 56.7   | 71.4  |
|                            | Unknown (%)     | 10.8      | 10.0  | 50.0  | 8.6       | 8.4    | 14.3  |
| <b>WEST</b>                |                 |           |       |       |           |        |       |
| <b>Mountain</b>            |                 |           |       |       |           |        |       |
| Colorado<br>(NPCR)         | No. of patients | 970       | 922   | 19    | 2,206     | 2,104  | 48    |
|                            | Localized (%)   | 18.1      | 18.0  | 21.1  | 14.9      | 14.8   | 12.5  |
|                            | Regional (%)    | 18.0      | 17.9  | 21.1  | 20.0      | 20.1   | 14.6  |
|                            | Distant (%)     | 56.1      | 56.6  | 36.8  | 60.2      | 60.2   | 70.8  |
|                            | Unknown (%)     | 7.7       | 7.5   | 21.1  | 4.9       | 4.9    | 2.1   |
| Idaho<br>(NPCR)            | No. of patients | 275       | 269   | -     | 647       | 631    | -     |
|                            | Localized (%)   | 12.7      | 12.6  | -     | 14.4      | 14.3   | -     |
|                            | Regional (%)    | 18.2      | 18.6  | -     | 18.9      | 18.9   | -     |
|                            | Distant (%)     | 60.7      | 60.6  | -     | 61.4      | 61.8   | -     |
|                            | Unknown (%)     | 8.4       | 8.2   | -     | 5.4       | 5.1    | -     |
| Montana<br>(NPCR)          | No. of patients | 251       | 243   | -     | 548       | 526    | -     |
|                            | Localized (%)   | 17.5      | 17.3  | -     | 10.4      | 10.3   | -     |
|                            | Regional (%)    | 22.7      | 21.8  | -     | 20.3      | 20.0   | -     |
|                            | Distant (%)     | 52.6      | 53.5  | -     | 61.5      | 61.8   | -     |
|                            | Unknown (%)     | 7.2       | 7.4   | -     | 7.8       | 8.0    | -     |
| New Mexico<br>(SEER)       | No. of patients | 410       | 374   | -     | 849       | 763    | 12    |
|                            | Localized (%)   | 12.4      | 12.3  | 0.0   | 15.0      | 15.5   | 0.0   |
|                            | Regional (%)    | 20.2      | 20.3  | 25.0  | 19.9      | 19.9   | 25.0  |
|                            | Distant (%)     | 57.1      | 57.0  | 75.0  | 55.0      | 54.5   | 58.3  |
|                            | Unknown (%)     | 10.2      | 10.4  | 0.0   | 10.1      | 10.1   | 16.7  |
| Utah<br>(SEER)             | No. of patients | 440       | 430   | -     | 865       | 830    | -     |
|                            | Localized (%)   | 16.4      | 16.7  | 0.0   | 15.8      | 15.9   | 0.0   |
|                            | Regional (%)    | 17.0      | 17.0  | 0.0   | 18.5      | 18.7   | 20.0  |
|                            | Distant (%)     | 63.4      | 63.3  | 100.0 | 61.8      | 62.0   | 40.0  |
|                            | Unknown (%)     | 3.2       | 3.0   | 0.0   | 3.8       | 3.4    | 40.0  |
| Wyoming<br>(NPCR)          | No. of patients | 116       | 114   | -     | 239       | 236    | -     |
|                            | Localized (%)   | 14.7      | 14.9  | 0.0   | 16.3      | 16.1   | -     |
|                            | Regional (%)    | 19.0      | 19.3  | 0.0   | 23.0      | 23.3   | -     |
|                            | Distant (%)     | 56.0      | 55.3  | 100.0 | 55.2      | 55.1   | -     |
|                            | Unknown (%)     | 10.3      | 10.5  | 0.0   | 5.4       | 5.5    | -     |
| <b>Pacific</b>             |                 |           |       |       |           |        |       |
| Alaska<br>(NPCR)           | No. of patients | 95        | 78    | -     | 231       | 167    | -     |
|                            | Localized (%)   | 20.0      | 20.5  | 0.0   | 18.2      | 18.6   | 0.0   |
|                            | Regional (%)    | 18.9      | 20.5  | 50.0  | 21.2      | 24.0   | 0.0   |
|                            | Distant (%)     | 55.8      | 53.8  | 0.0   | 52.8      | 49.7   | 75.0  |
|                            | Unknown (%)     | 5.3       | 5.1   | 50.0  | 7.8       | 7.8    | 25.0  |
| California<br>(NPCR/SEER)  | No. of patients | 7,793     | 6,675 | 314   | 16,281    | 13,591 | 797   |
|                            | Localized (%)   | 14.7      | 13.9  | 14.3  | 14.7      | 14.1   | 12.2  |
|                            | Regional (%)    | 16.3      | 15.7  | 12.7  | 18.5      | 18.0   | 15.1  |
|                            | Distant (%)     | 63.1      | 64.7  | 63.4  | 60.9      | 61.8   | 65.5  |
|                            | Unknown (%)     | 5.8       | 5.8   | 9.6   | 5.9       | 6.1    | 7.3   |

**SUPPORTING TABLE 1.** *Continued*

|                           | SEER Summary<br>Stage 2000 | 2001-2003 |       |       | 2004-2009 |       |       |
|---------------------------|----------------------------|-----------|-------|-------|-----------|-------|-------|
|                           |                            | All Races | White | Black | All Races | White | Black |
| Hawaii<br>(SEER)          | No. of patients            | 258       | 74    | -     | 565       | 159   | -     |
|                           | Localized (%)              | 14.7      | 9.5   | 0.0   | 13.5      | 10.7  | 25.0  |
|                           | Regional (%)               | 25.2      | 14.9  | 0.0   | 23.2      | 22.0  | 25.0  |
|                           | Distant (%)                | 55.8      | 70.3  | 100.0 | 59.6      | 62.9  | 50.0  |
|                           | Unknown (%)                | 4.3       | 5.4   | 0.0   | 3.7       | 4.4   | 0.0   |
| Oregon<br>(NPCR)          | No. of patients            | 1,003     | 958   | -     | 2,061     | 1,957 | 13    |
|                           | Localized (%)              | 14.8      | 14.5  | 0.0   | 12.8      | 12.6  | 7.7   |
|                           | Regional (%)               | 18.9      | 19.0  | 50.0  | 19.5      | 19.3  | 15.4  |
|                           | Distant (%)                | 58.6      | 58.8  | 50.0  | 61.6      | 62.0  | 76.9  |
|                           | Unknown (%)                | 7.7       | 7.7   | 0.0   | 6.1       | 6.2   | 0.0   |
| Washington<br>(NPCR/SEER) | No. of patients            | 1,711     | 1,566 | 36    | 2,787     | 2,582 | 40    |
|                           | Localized (%)              | 13.3      | 13.0  | 2.8   | 12.6      | 11.9  | 17.5  |
|                           | Regional (%)               | 18.4      | 17.9  | 30.6  | 17.0      | 16.8  | 15.0  |
|                           | Distant (%)                | 63.3      | 64.2  | 61.1  | 63.6      | 64.2  | 57.5  |
|                           | Unknown (%)                | 5.0       | 4.9   | 5.6   | 6.9       | 7.1   | 10.0  |

Abbreviations: NPCR, National Program of Cancer Registries; SEER indicates Surveillance, Epidemiology, and End Results program.

<sup>a</sup> Stage at diagnosis is the SEER Summary Stage 2000 (SS2000). Information on stage was not available for 2 states (Maryland and Wisconsin) or for Rhode Island for cases diagnosed between 2004 and 2009.

**SUPPORTING TABLE 2.** Ovarian Cancer: Age-Standardized Net Survival (%) at 1, 3, and 5 Years Among Females Ages 15 to 99 Years by Race, Calendar Period, and US State (Grouped by US Census Region) between 2001 and 2009<sup>a</sup>

| Years                 | 2001-2003 |           |        |           |        |           | 2004-2009 |           |        |           |        |            |
|-----------------------|-----------|-----------|--------|-----------|--------|-----------|-----------|-----------|--------|-----------|--------|------------|
|                       | All Races |           | White  |           | Black  |           | All Races |           | White  |           | Black  |            |
|                       | NS (%)    | 95% CI    | NS (%) | 95% CI    | NS (%) | 95% CI    | NS (%)    | 95% CI    | NS (%) | 95% CI    | NS (%) | 95% CI     |
| <b>UNITED STATES</b>  |           |           |        |           |        |           |           |           |        |           |        |            |
| 1                     | 72.3      | 71.9-72.7 | 73.3   | 72.9-73.7 | 59.8   | 58.2-61.3 | 73.3      | 73.0-73.6 | 74.2   | 73.9-74.5 | 62.5   | 61.4-63.6  |
| 3                     | 50.9      | 50.4-51.3 | 51.6   | 51.1-52.1 | 39.4   | 37.8-41.0 | 52.8      | 52.4-53.1 | 53.6   | 53.2-54.0 | 41.6   | 40.3-42.9  |
| 5                     | 39.6      | 39.1-40.0 | 40.1   | 39.6-40.6 | 29.6   | 28.1-31.1 | 41.0      | 40.5-41.5 | 41.7   | 41.2-42.2 | 31.1   | 29.5-32.7  |
| <b>NORTHEAST</b>      |           |           |        |           |        |           |           |           |        |           |        |            |
| <b>New England</b>    |           |           |        |           |        |           |           |           |        |           |        |            |
| 1                     | 77.8      | 75.1-80.5 | 78.6   | 75.8-81.4 | 68.1   | 52.4-83.7 | 77.1      | 75.1-79.1 | 77.6   | 75.5-79.6 | 67.2   | 57.5-77.0  |
| 3                     | 54.7      | 51.3-58.0 | 55.2   | 51.8-58.7 | 54.4   | 37.5-71.4 | 54.2      | 51.4-57.0 | 54.3   | 51.5-57.2 | 52.4   | 41.2-63.7  |
| 5                     | 40.2      | 36.8-43.6 | 40.5   | 37.0-43.9 | 42.9   | 26.2-59.7 | 43.4      | 39.9-46.8 | 43.1   | 39.5-46.8 | 41.7   | 32.1-51.2  |
| <b>Massachusetts</b>  |           |           |        |           |        |           |           |           |        |           |        |            |
| 1                     | 73.6      | 71.5-75.7 | 73.9   | 71.8-76.0 | 65.3   | 51.3-79.4 | 75.6      | 74.2-77.1 | 75.6   | 74.1-77.1 | 71.5   | 60.5-82.4  |
| 3                     | 50.8      | 48.4-53.2 | 50.8   | 48.4-53.3 | 48.2   | 33.2-63.2 | 55.5      | 53.5-57.5 | 55.3   | 53.3-57.4 | 45.1   | 36.1-54.0  |
| 5                     | 40.1      | 37.7-42.5 | 39.9   | 37.5-42.4 | 34.7   | 20.2-49.1 | 43.5      | 40.9-46.0 | 43.0   | 40.4-45.6 | 41.7   | 29.4-54.0  |
| <b>New Hampshire</b>  |           |           |        |           |        |           |           |           |        |           |        |            |
| 1                     | 75.1      | 70.0-80.2 | 75.2   | 70.0-80.4 | -      | -         | 74.1      | 70.7-77.6 | 74.9   | 71.4-78.4 | -      | -          |
| 3                     | 52.0      | 45.9-58.1 | 53.2   | 46.9-59.5 | -      | -         | 54.8      | 50.2-59.3 | 55.1   | 50.4-59.8 | -      | -          |
| 5                     | 43.8      | 37.4-50.3 | 44.7   | 38.1-51.3 | -      | -         | 40.2      | 34.3-46.2 | 40.9   | 34.7-47.0 | -      | -          |
| <b>Rhode Island</b>   |           |           |        |           |        |           |           |           |        |           |        |            |
| 1                     | 77.9      | 72.6-83.2 | 78.2   | 72.8-83.6 | -      | -         | 72.2      | 68.0-76.3 | 72.3   | 68.0-76.6 | 84.6   | 64.6-100.0 |
| 3                     | 51.9      | 45.0-58.8 | 51.9   | 44.8-58.9 | -      | -         | 54.0      | 48.8-59.2 | 54.0   | 48.6-59.4 | 73.4   | 45.9-100.0 |
| 5                     | 42.5      | 35.5-49.5 | 42.2   | 35.0-49.3 | -      | -         | 50.0      | 43.9-56.0 | 49.5   | 43.2-55.8 | 74.1   | 46.3-100.0 |
| <b>Mid Atlantic</b>   |           |           |        |           |        |           |           |           |        |           |        |            |
| <b>New Jersey</b>     |           |           |        |           |        |           |           |           |        |           |        |            |
| 1                     | 70.7      | 68.9-72.5 | 71.5   | 69.6-73.4 | 59.3   | 52.6-66.0 | 72.9      | 71.6-74.3 | 74.3   | 72.9-75.7 | 58.2   | 53.5-62.9  |
| 3                     | 50.3      | 48.3-52.3 | 51.2   | 49.0-53.3 | 38.7   | 32.4-45.0 | 52.3      | 50.5-54.1 | 53.4   | 51.5-55.3 | 38.4   | 32.5-44.3  |
| 5                     | 39.2      | 37.2-41.3 | 39.9   | 37.7-42.0 | 28.9   | 23.0-34.8 | 39.4      | 37.0-41.8 | 40.4   | 37.9-42.9 | 26.6   | 20.5-32.7  |
| <b>New York</b>       |           |           |        |           |        |           |           |           |        |           |        |            |
| 1                     | 71.3      | 70.0-72.5 | 72.2   | 70.9-73.6 | 61.6   | 57.3-65.9 | 73.9      | 73.0-74.8 | 75.0   | 74.0-75.9 | 64.7   | 61.7-67.8  |
| 3                     | 50.1      | 48.7-51.5 | 50.8   | 49.3-52.4 | 42.3   | 37.9-46.6 | 53.6      | 52.4-54.8 | 54.7   | 53.4-56.0 | 43.5   | 39.8-47.2  |
| 5                     | 39.7      | 38.2-41.1 | 40.3   | 38.8-41.9 | 31.5   | 27.4-35.5 | 43.0      | 41.4-44.6 | 43.8   | 42.1-45.5 | 34.8   | 30.3-39.4  |
| <b>Pennsylvania</b>   |           |           |        |           |        |           |           |           |        |           |        |            |
| 1                     | 71.7      | 70.3-73.2 | 72.4   | 71.0-73.9 | 57.5   | 50.7-64.3 | 72.2      | 71.1-73.3 | 72.8   | 71.7-73.9 | 63.0   | 58.2-67.8  |
| 3                     | 50.3      | 48.7-52.0 | 51.0   | 49.3-52.7 | 33.3   | 27.0-39.7 | 52.3      | 50.9-53.7 | 52.4   | 51.0-53.9 | 49.8   | 44.2-55.4  |
| 5                     | 39.8      | 38.2-41.5 | 40.1   | 38.3-41.8 | 27.3   | 21.4-33.3 | 40.2      | 38.4-42.0 | 40.4   | 38.5-42.2 | 38.1   | 30.9-45.3  |
| <b>SOUTH</b>          |           |           |        |           |        |           |           |           |        |           |        |            |
| <b>South Atlantic</b> |           |           |        |           |        |           |           |           |        |           |        |            |
| <b>Delaware</b>       |           |           |        |           |        |           |           |           |        |           |        |            |
| 1                     | 76.1      | 70.2-82.0 | 76.5   | 70.3-82.7 | 85.6   | 72.4-98.8 | 76.6      | 72.4-80.8 | 77.6   | 73.1-82.0 | 74.3   | 61.6-87.0  |
| 3                     | 55.6      | 48.3-62.8 | 56.4   | 48.7-64.2 | 53.0   | 34.2-71.8 | 52.4      | 46.6-58.2 | 55.0   | 48.9-61.2 | 36.3   | 19.7-52.9  |
| 5                     | 45.4      | 37.8-53.0 | 46.8   | 38.7-54.9 | 46.5   | 27.3-65.6 | 44.3      | 37.0-51.6 | 47.0   | 39.1-54.9 | 23.0   | 2.8-43.3   |
| <b>Florida</b>        |           |           |        |           |        |           |           |           |        |           |        |            |
| 1                     | 74.0      | 72.7-75.2 | 75.2   | 73.9-76.5 | 58.5   | 53.2-63.8 | 75.4      | 74.5-76.3 | 76.4   | 75.5-77.3 | 63.2   | 59.5-66.9  |
| 3                     | 51.1      | 49.6-52.5 | 52.0   | 50.5-53.6 | 39.1   | 33.7-44.6 | 56.1      | 54.9-57.3 | 57.0   | 55.7-58.2 | 45.1   | 40.7-49.6  |
| 5                     | 40.9      | 39.4-42.4 | 41.7   | 40.1-43.3 | 29.6   | 24.6-34.7 | 47.3      | 45.8-48.9 | 47.8   | 46.2-49.4 | 39.6   | 34.4-44.8  |
| <b>Georgia</b>        |           |           |        |           |        |           |           |           |        |           |        |            |
| 1                     | 70.1      | 67.9-72.3 | 71.8   | 69.4-74.2 | 62.6   | 57.2-68.0 | 70.3      | 68.8-71.9 | 72.4   | 70.7-74.1 | 61.6   | 57.6-65.6  |
| 3                     | 49.3      | 46.9-51.8 | 51.2   | 48.5-54.0 | 31.9   | 26.5-37.2 | 49.8      | 47.8-51.7 | 51.7   | 49.5-53.9 | 42.1   | 37.5-46.7  |
| 5                     | 39.2      | 36.7-41.7 | 40.8   | 38.0-43.5 | 31.9   | 26.5-37.2 | 37.1      | 34.6-39.7 | 39.0   | 36.1-41.8 | 31.3   | 26.0-36.7  |
| <b>Maryland</b>       |           |           |        |           |        |           |           |           |        |           |        |            |
| 1                     | 72.5      | 69.8-75.2 | 73.1   | 70.2-76.0 | 68.6   | 61.3-75.8 | 72.0      | 70.1-74.0 | 73.9   | 71.8-76.1 | 63.3   | 58.2-68.4  |
| 3                     | 51.0      | 47.9-54.1 | 52.7   | 49.3-56.1 | 43.0   | 35.2-50.8 | 50.9      | 48.4-53.5 | 52.9   | 50.1-55.8 | 42.2   | 36.1-48.2  |
| 5                     | 39.3      | 36.2-42.4 | 40.8   | 37.4-44.3 | 31.6   | 24.2-38.9 | 37.8      | 34.7-40.9 | 41.4   | 37.9-45.0 | 21.3   | 15.0-27.6  |
| <b>North Carolina</b> |           |           |        |           |        |           |           |           |        |           |        |            |
| 1                     | 65.4      | 63.2-67.5 | 66.7   | 64.4-69.0 | 56.1   | 49.8-62.5 | 74.2      | 72.8-75.6 | 75.7   | 74.2-77.2 | 64.3   | 60.1-68.4  |

**SUPPORTING TABLE 2. Continued**

| Years                     | 2001-2003 |        |           |        |           |        | 2004-2009 |        |           |        |           |        |           |
|---------------------------|-----------|--------|-----------|--------|-----------|--------|-----------|--------|-----------|--------|-----------|--------|-----------|
|                           | All Races |        | White     |        | Black     |        | All Races |        | White     |        | Black     |        |           |
|                           | NS (%)    | 95% CI |           |
| (NPCR)                    | 3         | 51.1   | 48.7-53.4 | 52.1   | 49.6-54.6 | 44.5   | 37.9-51.1 | 54.3   | 52.4-56.2 | 56.5   | 54.5-58.6 | 40.6   | 36.0-45.2 |
|                           | 5         | 39.3   | 37.0-41.6 | 40.3   | 37.8-42.7 | 33.1   | 26.8-39.5 | 43.5   | 41.0-45.9 | 45.3   | 42.6-48.0 | 30.8   | 25.8-35.8 |
| South Carolina<br>(NPCR)  | 1         | 75.2   | 72.4-78.0 | 78.9   | 75.9-81.8 | 57.3   | 50.2-64.4 | 76.5   | 74.5-78.6 | 79.3   | 77.1-81.4 | 63.3   | 58.1-68.4 |
|                           | 3         | 53.5   | 50.2-56.8 | 56.3   | 52.6-60.0 | 39.6   | 32.6-46.6 | 54.2   | 51.4-56.9 | 56.4   | 53.4-59.5 | 42.6   | 36.0-49.2 |
|                           | 5         | 40.6   | 37.3-43.9 | 42.5   | 38.8-46.2 | 31.8   | 25.0-38.6 | 41.7   | 38.2-45.2 | 43.6   | 39.7-47.4 | 27.4   | 19.7-35.2 |
| West Virginia<br>(NPCR)   | 1         | 66.8   | 62.9-70.7 | 66.6   | 62.6-70.5 | 68.1   | 44.8-91.5 | 67.5   | 64.3-70.6 | 67.7   | 64.5-70.8 | 45.6   | 20.5-70.7 |
|                           | 3         | 45.2   | 41.0-49.5 | 45.3   | 41.0-49.6 | 36.6   | 11.5-61.6 | 49.1   | 45.2-53.0 | 49.1   | 45.2-53.1 | 30.7   | 7.5-54.0  |
|                           | 5         | 33.3   | 29.2-37.5 | 32.8   | 28.6-37.0 | 36.6   | 11.5-61.6 | 33.4   | 28.6-38.2 | 33.1   | 28.2-38.0 | 33.5   | 8.1-58.9  |
| <b>East South Central</b> |           |        |           |        |           |        |           |        |           |        |           |        |           |
| Alabama<br>(NPCR)         | 1         | 71.4   | 68.6-74.1 | 74.1   | 71.2-77.1 | 57.3   | 50.2-64.4 | 70.1   | 68.1-72.0 | 72.1   | 69.9-74.2 | 59.4   | 54.2-64.6 |
|                           | 3         | 49.2   | 46.1-52.4 | 51.9   | 48.5-55.4 | 35.0   | 28.1-41.9 | 49.0   | 46.5-51.5 | 50.6   | 47.8-53.4 | 40.3   | 34.4-46.2 |
|                           | 5         | 37.9   | 34.7-41.1 | 40.2   | 36.6-43.8 | 24.5   | 18.1-30.9 | 36.2   | 32.9-39.4 | 37.3   | 33.7-41.0 | 27.3   | 21.3-33.4 |
| Kentucky<br>(NPCR/SEER)   | 1         | 70.3   | 67.4-73.2 | 70.6   | 67.7-73.6 | 69.3   | 55.4-83.2 | 72.3   | 70.3-74.4 | 72.0   | 69.9-74.1 | 78.1   | 67.5-88.8 |
|                           | 3         | 48.0   | 44.6-51.3 | 48.1   | 44.6-51.5 | 50.3   | 34.7-65.8 | 50.8   | 48.1-53.6 | 51.0   | 48.2-53.8 | 41.1   | 28.3-53.8 |
|                           | 5         | 37.4   | 34.1-40.7 | 37.7   | 34.3-41.1 | 34.7   | 19.7-49.6 | 36.4   | 32.8-39.9 | 36.8   | 33.1-40.5 | 16.5   | 10.1-22.9 |
| Mississippi<br>(NPCR)     | 1         | 78.9   | 72.7-85.2 | 83.9   | 77.4-90.4 | 69.0   | 56.0-82.0 | 71.2   | 68.4-74.0 | 76.9   | 73.9-79.9 | 51.5   | 45.4-57.5 |
|                           | 3         | 50.7   | 43.1-58.4 | 55.8   | 46.8-64.7 | 45.6   | 31.4-59.8 | 49.3   | 45.6-52.9 | 54.8   | 50.6-59.1 | 29.2   | 23.2-35.1 |
|                           | 5         | 35.9   | 28.5-43.2 | 38.1   | 29.3-46.9 | 37.2   | 23.3-51.1 | 40.3   | 35.6-45.0 | 44.4   | 38.8-49.9 | 23.5   | 18.4-28.6 |
| Tennessee<br>(NPCR)       | 1         | 71.2   | 66.8-75.7 | 74.0   | 69.4-78.6 | 54.1   | 39.5-68.8 | 72.1   | 70.3-73.9 | 73.1   | 71.2-75.0 | 61.9   | 55.6-68.2 |
|                           | 3         | 48.6   | 43.6-53.7 | 49.5   | 44.0-54.9 | 44.3   | 29.4-59.2 | 53.1   | 50.7-55.5 | 54.1   | 51.5-56.6 | 44.2   | 36.8-51.7 |
|                           | 5         | 37.2   | 32.2-42.2 | 37.9   | 32.5-43.3 | 33.5   | 19.2-47.8 | 40.5   | 37.3-43.7 | 41.4   | 38.1-44.8 | 30.6   | 22.0-39.2 |
| <b>West South Central</b> |           |        |           |        |           |        |           |        |           |        |           |        |           |
| Louisiana<br>(NPCR/SEER)  | 1         | 67.6   | 64.5-70.6 | 70.8   | 67.4-74.1 | 55.4   | 48.8-61.9 | 69.0   | 66.8-71.3 | 71.6   | 69.0-74.1 | 58.9   | 53.6-64.2 |
|                           | 3         | 46.1   | 42.8-49.4 | 48.3   | 44.6-52.1 | 37.1   | 30.3-43.8 | 46.4   | 43.5-49.4 | 50.0   | 46.7-53.3 | 33.1   | 26.8-39.4 |
|                           | 5         | 34.9   | 31.6-38.2 | 37.4   | 33.7-41.1 | 24.8   | 18.5-31.2 | 35.5   | 31.8-39.1 | 38.5   | 34.3-42.7 | 16.8   | 11.7-21.8 |
| Oklahoma<br>(NPCR)        | 1         | 71.2   | 68.3-74.2 | 71.2   | 68.0-74.3 | 74.3   | 61.0-87.6 | 72.9   | 70.6-75.1 | 73.5   | 71.2-75.9 | 63.3   | 51.9-74.6 |
|                           | 3         | 51.4   | 48.0-54.9 | 51.6   | 48.0-55.2 | 47.1   | 31.6-62.6 | 55.7   | 52.7-58.6 | 57.0   | 53.9-60.1 | 40.3   | 28.8-51.8 |
|                           | 5         | 40.4   | 37.0-43.9 | 40.1   | 36.4-43.8 | 37.5   | 22.0-53.1 | 41.3   | 37.3-45.2 | 42.5   | 38.2-46.7 | 37.8   | 27.0-48.5 |
| Texas<br>(NPCR)           | 1         | 73.4   | 71.9-74.9 | 74.7   | 73.1-76.2 | 57.9   | 52.5-63.4 | 74.0   | 73.0-75.1 | 74.7   | 73.6-75.8 | 63.7   | 59.7-67.8 |
|                           | 3         | 51.0   | 49.3-52.7 | 52.4   | 50.6-54.2 | 35.1   | 29.9-40.2 | 53.1   | 51.7-54.5 | 53.9   | 52.4-55.4 | 39.3   | 34.6-44.0 |
|                           | 5         | 39.5   | 37.8-41.3 | 40.8   | 38.9-42.6 | 24.4   | 19.5-29.2 | 39.8   | 38.0-41.6 | 40.7   | 38.8-42.7 | 25.5   | 20.5-30.5 |
| <b>MIDWEST</b>            |           |        |           |        |           |        |           |        |           |        |           |        |           |
| <b>East North Central</b> |           |        |           |        |           |        |           |        |           |        |           |        |           |
| Michigan<br>(NPCR)        | 1         | 70.7   | 68.9-72.6 | 72.1   | 70.2-74.0 | 52.8   | 45.8-59.9 | 70.8   | 69.5-72.2 | 71.7   | 70.3-73.1 | 61.0   | 56.1-65.8 |
|                           | 3         | 50.3   | 48.2-52.4 | 51.1   | 48.9-53.3 | 35.5   | 29.0-42.1 | 50.8   | 49.1-52.6 | 51.6   | 49.7-53.4 | 41.3   | 35.6-47.1 |
|                           | 5         | 38.1   | 36.1-40.2 | 38.6   | 36.4-40.8 | 27.9   | 21.5-34.3 | 39.7   | 37.9-41.9 | 40.3   | 37.9-42.6 | 32.2   | 25.6-38.8 |
| Ohio<br>(NPCR)            | 1         | 71.9   | 70.2-73.7 | 72.4   | 70.6-74.2 | 64.1   | 57.3-70.9 | 74.4   | 73.2-75.7 | 75.0   | 73.7-76.2 | 67.0   | 62.0-72.1 |
|                           | 3         | 50.8   | 48.8-52.8 | 51.4   | 49.3-53.4 | 42.2   | 35.1-49.3 | 52.5   | 50.9-54.1 | 53.5   | 51.7-55.2 | 39.8   | 34.0-45.7 |
|                           | 5         | 39.2   | 37.2-41.2 | 39.7   | 37.6-41.8 | 30.1   | 23.2-36.9 | 39.5   | 37.4-41.6 | 40.0   | 37.7-42.2 | 31.2   | 24.8-37.5 |
| Wisconsin<br>(NPCR)       | 1         | 77.9   | 75.7-80.1 | 77.7   | 75.5-80.0 | 79.9   | 67.0-92.9 | 77.9   | 76.3-79.6 | 78.2   | 76.5-79.9 | 74.4   | 63.5-85.2 |
|                           | 3         | 55.4   | 52.6-58.1 | 55.5   | 52.7-58.3 | 49.6   | 33.3-65.9 | 54.1   | 51.8-56.4 | 54.6   | 52.3-57.0 | 49.1   | 35.7-62.5 |
|                           | 5         | 42.1   | 39.3-44.9 | 41.8   | 38.9-44.6 | 47.6   | 31.2-64.0 | 40.8   | 37.8-43.8 | 41.5   | 38.4-44.5 | 35.1   | 23.9-46.3 |
| <b>West North Central</b> |           |        |           |        |           |        |           |        |           |        |           |        |           |
| Iowa                      | 1         | 73.1   | 70.2-76.0 | 73.4   | 70.5-76.3 | -      | -         | 71.4   | 69.1-73.6 | 71.4   | 69.2-73.7 | 62.7   | 36.3-89.0 |

**SUPPORTING TABLE 2. Continued**

| Years           |                        | 2001-2003 |           |        |           |        |           | 2004-2009 |           |        |           |        |           |
|-----------------|------------------------|-----------|-----------|--------|-----------|--------|-----------|-----------|-----------|--------|-----------|--------|-----------|
|                 |                        | All Races |           | White  |           | Black  |           | All Races |           | White  |           | Black  |           |
|                 |                        | NS (%)    | 95% CI    | NS (%) | 95% CI    | NS (%) | 95% CI    | NS (%)    | 95% CI    | NS (%) | 95% CI    | NS (%) | 95% CI    |
| 3               | (SEER)                 | 51.7      | 48.2-55.1 | 51.9   | 48.4-55.4 | -      | -         | 49.4      | 46.4-52.3 | 49.3   | 46.4-52.3 | 53.0   | 22.5-83.5 |
| 5               |                        | 38.4      | 34.9-41.9 | 38.8   | 35.3-42.3 | -      | -         | 34.7      | 31.0-38.4 | 35.0   | 31.3-38.7 | 18.0   | 0.0-42.1  |
| 1               | Nebraska (NPCR)        | 75.1      | 71.2-79.0 | 75.3   | 71.3-79.2 | -      | -         | 74.6      | 71.7-77.5 | 75.1   | 72.2-78.0 | 49.4   | 21.6-77.1 |
| 3               |                        | 49.6      | 44.9-54.3 | 50.0   | 45.2-54.8 | -      | -         | 52.7      | 48.7-56.6 | 53.4   | 49.5-57.4 | 24.7   | 0.1-49.3  |
| 5               |                        | 36.4      | 31.7-41.2 | 36.4   | 31.6-41.2 | -      | -         | 38.5      | 33.7-43.3 | 39.0   | 34.1-43.8 | 24.8   | 0.1-49.5  |
| <b>WEST</b>     |                        |           |           |        |           |        |           |           |           |        |           |        |           |
| <b>Mountain</b> |                        |           |           |        |           |        |           |           |           |        |           |        |           |
| 1               | Colorado (NPCR)        | 75.6      | 72.7-78.6 | 75.5   | 72.5-78.5 | 73.9   | 54.7-93.2 | 75.0      | 73.1-77.0 | 75.2   | 73.2-77.2 | 66.0   | 52.2-79.8 |
| 3               |                        | 52.7      | 49.2-56.2 | 52.9   | 49.3-56.5 | 48.8   | 26.4-71.3 | 56.1      | 53.5-58.7 | 55.9   | 53.2-58.5 | 55.9   | 40.2-71.7 |
| 5               |                        | 40.5      | 37.1-44.0 | 40.5   | 37.0-44.0 | 39.2   | 17.1-61.2 | 43.5      | 40.0-46.9 | 43.4   | 39.9-46.9 | 50.0   | 31.5-68.5 |
| 1               | Idaho (NPCR)           | 69.7      | 64.3-75.1 | 69.7   | 64.3-75.1 | -      | -         | 74.0      | 70.5-77.4 | 74.6   | 71.0-78.1 | -      | -         |
| 3               |                        | 49.8      | 44.1-55.5 | 49.7   | 43.9-55.5 | -      | -         | 51.5      | 46.8-56.2 | 51.5   | 46.6-56.3 | -      | -         |
| 5               |                        | 38.4      | 32.7-44.1 | 38.6   | 32.8-44.3 | -      | -         | 38.8      | 32.4-45.2 | 38.2   | 31.6-44.7 | -      | -         |
| 1               | Montana (NPCR)         | 77.7      | 72.0-83.4 | 77.2   | 71.4-83.0 | -      | -         | 73.5      | 69.6-77.3 | 73.4   | 69.4-77.3 | -      | -         |
| 3               |                        | 56.7      | 49.8-63.7 | 57.1   | 50.1-64.1 | -      | -         | 51.3      | 46.1-56.4 | 51.6   | 46.3-56.8 | -      | -         |
| 5               |                        | 39.1      | 32.3-45.8 | 40.0   | 33.1-46.8 | -      | -         | 39.4      | 33.1-45.7 | 40.0   | 33.6-46.3 | -      | -         |
| 1               | New Mexico (SEER)      | 71.3      | 66.9-75.8 | 72.1   | 67.5-76.6 | -      | -         | 71.0      | 67.8-74.2 | 70.7   | 67.4-74.1 | 75.9   | 52.3-99.5 |
| 3               |                        | 52.5      | 47.5-57.4 | 52.4   | 47.2-57.6 | -      | -         | 50.7      | 46.5-54.8 | 50.9   | 46.5-55.2 | 43.5   | 14.3-72.7 |
| 5               |                        | 40.0      | 35.0-45.0 | 40.2   | 34.9-45.5 | -      | -         | 42.3      | 36.9-47.8 | 41.2   | 35.4-47.0 | 50.3   | 16.6-84.1 |
| 1               | Utah (SEER)            | 69.9      | 65.5-74.4 | 70.2   | 65.6-74.7 | -      | -         | 71.6      | 68.4-74.8 | 72.5   | 69.3-75.7 | -      | -         |
| 3               |                        | 47.4      | 42.5-52.3 | 47.4   | 42.5-52.4 | -      | -         | 50.8      | 46.7-54.8 | 51.5   | 47.3-55.6 | -      | -         |
| 5               |                        | 36.1      | 31.4-40.9 | 36.3   | 31.5-41.1 | -      | -         | 41.5      | 36.9-46.1 | 41.8   | 37.1-46.6 | -      | -         |
| 1               | Wyoming (NPCR)         | 73.6      | 65.4-81.9 | 73.9   | 65.6-82.2 | -      | -         | 76.6      | 71.1-82.1 | 76.8   | 71.3-82.4 | -      | -         |
| 3               |                        | 49.5      | 40.4-58.7 | 49.6   | 40.4-58.7 | -      | -         | 57.5      | 49.9-65.0 | 57.5   | 49.9-65.1 | -      | -         |
| 5               |                        | 38.4      | 29.6-47.2 | 38.3   | 29.5-47.1 | -      | -         | 35.8      | 26.3-45.3 | 35.7   | 26.2-45.2 | -      | -         |
| <b>Pacific</b>  |                        |           |           |        |           |        |           |           |           |        |           |        |           |
| 1               | Alaska (NPCR)          | 85.7      | 76.9-94.5 | 86.7   | 77.3-96.2 | -      | -         | 68.9      | 61.6-76.2 | 71.8   | 63.5-80.0 | -      | -         |
| 3               |                        | 55.0      | 42.9-67.1 | 52.4   | 39.5-65.2 | -      | -         | 54.2      | 46.0-62.5 | 60.5   | 50.6-70.4 | -      | -         |
| 5               |                        | 34.9      | 25.2-44.7 | 29.3   | 20.2-38.4 | -      | -         | 45.1      | 35.2-54.9 | 51.4   | 40.2-62.5 | -      | -         |
| 1               | California (NPCR/SEER) | 72.0      | 70.9-73.0 | 72.7   | 71.7-73.8 | 58.7   | 53.0-64.5 | 72.2      | 71.4-72.9 | 72.6   | 71.8-73.4 | 60.4   | 56.5-64.2 |
| 3               |                        | 50.7      | 49.5-51.9 | 51.1   | 49.8-52.3 | 34.3   | 29.0-39.7 | 52.0      | 51.0-53.0 | 52.2   | 51.1-53.2 | 39.8   | 35.3-44.2 |
| 5               |                        | 39.6      | 38.4-40.8 | 39.7   | 38.5-41.0 | 24.8   | 20.0-29.6 | 40.5      | 39.2-41.8 | 40.6   | 39.3-42.0 | 29.8   | 24.8-34.8 |
| 1               | Hawaii (SEER)          | 75.5      | 70.6-80.5 | 70.9   | 60.4-81.4 | -      | -         | 72.0      | 67.9-76.1 | 72.9   | 65.4-80.3 | -      | -         |
| 3               |                        | 55.5      | 49.3-61.8 | 49.0   | 37.4-60.7 | -      | -         | 49.9      | 44.9-54.9 | 49.6   | 40.1-59.0 | -      | -         |
| 5               |                        | 42.7      | 36.3-49.1 | 40.2   | 28.7-51.8 | -      | -         | 41.2      | 35.1-47.2 | 36.4   | 26.3-46.4 | -      | -         |
| 1               | Oregon (NPCR)          | 75.0      | 72.3-77.7 | 75.1   | 72.3-77.8 | -      | -         | 73.2      | 71.2-75.2 | 73.2   | 71.1-75.2 | 68.7   | 44.0-93.5 |
| 3               |                        | 52.4      | 49.2-55.7 | 51.7   | 48.4-55.1 | -      | -         | 52.0      | 49.2-54.7 | 51.5   | 48.7-54.3 | 60.9   | 34.4-87.4 |
| 5               |                        | 39.7      | 36.4-43.0 | 39.2   | 35.9-42.6 | -      | -         | 40.5      | 37.0-44.0 | 39.7   | 36.2-43.3 | 41.6   | 9.5-73.8  |
| 1               | Washington (NPCR)      | 75.7      | 73.6-77.8 | 76.4   | 74.3-78.6 | 52.8   | 36.3-69.3 | 74.3      | 72.7-76.0 | 74.5   | 72.8-76.2 | 64.8   | 49.5-80.1 |
| 3               |                        | 52.6      | 50.1-55.1 | 53.0   | 50.4-55.6 | 29.7   | 14.4-45.1 | 53.1      | 51.0-55.2 | 52.7   | 50.5-54.9 | 53.9   | 37.1-70.7 |
| 5               |                        | 40.8      | 38.2-43.3 | 40.5   | 37.8-43.2 | 27.4   | 12.3-42.5 | 41.2      | 38.4-44.0 | 40.3   | 37.4-43.2 | 48.3   | 29.3-67.4 |

Abbreviations: CI, confidence interval; NPCR, National Program of Cancer Registries; NS, net survival; SEER, Surveillance, Epidemiology, and End Results program.  
<sup>a</sup>Unstandardized estimates are italicized.

**SUPPORTING TABLE 3.** Ovarian Cancer: Five-Year Age-Standardized Net Survival (%) Among Females Ages 15 to 99 Years by Stage at Diagnosis, Race, Calendar Period, and US State (Grouped by US Census Region) Between 2001 and 2009

|                                      |      | 2001-2003 |        |           |        |            |        | 2004-2009  |        |            |        |             |        |
|--------------------------------------|------|-----------|--------|-----------|--------|------------|--------|------------|--------|------------|--------|-------------|--------|
|                                      |      | All Races |        | White     |        | Black      |        | All Races  |        | White      |        | Black       |        |
| SEER Summary Stage 2000 <sup>a</sup> |      | NS (%)    | 95% CI | NS (%)    | 95% CI | NS (%)     | 95% CI | NS (%)     | 95% CI | NS (%)     | 95% CI | NS (%)      | 95% CI |
| <b>UNITED STATES</b>                 |      |           |        |           |        |            |        |            |        |            |        |             |        |
| <b>NORTHEAST</b>                     |      |           |        |           |        |            |        |            |        |            |        |             |        |
| <b>New England</b>                   |      |           |        |           |        |            |        |            |        |            |        |             |        |
| Connecticut (SEER)                   |      |           |        |           |        |            |        |            |        |            |        |             |        |
| All stages                           | 39.6 | 39.1-40.0 | 40.1   | 39.6-40.6 | 29.6   | 28.1-31.1  | 41.0   | 40.5-41.5  | 41.7   | 41.2-42.2  | 31.1   | 29.5-32.7   |        |
| Localized                            | 84.8 | 83.3-86.2 | 84.9   | 83.3-86.4 | 78.8   | 71.9-85.7  | 86.4   | 84.8-87.9  | 86.9   | 85.2-88.5  | 80.9   | 74.8-86.9   |        |
| Regional                             | 53.9 | 52.8-55.1 | 54.7   | 53.5-55.9 | 38.6   | 34.3-42.9  | 60.9   | 59.7-62.2  | 61.6   | 60.3-62.9  | 45.3   | 40.7-49.9   |        |
| Distant                              | 25.2 | 24.7-25.7 | 25.8   | 25.2-26.4 | 16.3   | 14.7-18.0  | 27.4   | 26.9-28.0  | 28.0   | 27.4-28.7  | 18.6   | 16.8-20.5   |        |
| Unknown                              | 33.1 | 31.9-34.4 | 33.7   | 32.4-35.1 | 26.8   | 23.3-30.2  | 32.6   | 31.3-33.9  | 33.6   | 32.2-35.0  | 25.7   | 22.0-29.4   |        |
| <b>Massachusetts (NPCR)</b>          |      |           |        |           |        |            |        |            |        |            |        |             |        |
| All stages                           | 40.2 | 36.8-43.6 | 40.5   | 37.0-43.9 | 42.9   | 26.2-59.7  | 43.4   | 39.9-46.8  | 43.1   | 39.5-46.8  | 41.7   | 32.1-51.2   |        |
| Localized                            | 84.5 | 74.3-94.8 | 84.0   | 73.5-94.4 | -      | -          | 84.5   | 74.6-94.4  | 83.4   | 73.2-93.6  | 100.0  | 100.0-100.0 |        |
| Regional                             | 68.7 | 59.4-77.9 | 69.1   | 59.6-78.6 | 23.9   | 6.7-41.0   | 27.3   | 23.2-31.4  | 27.3   | 23.1-31.6  | 28.3   | 18.8-37.7   |        |
| Distant                              | 24.3 | 20.7-28.0 | 24.4   | 20.7-28.2 | 19.6   | 7.6-31.6   | 21.6   | 9.1-34.1   | 23.6   | 10.1-37.0  | -      | -           |        |
| Unknown                              | 40.1 | 37.7-42.5 | 39.9   | 37.5-42.4 | 34.7   | 20.2-49.1  | 43.5   | 40.9-46.0  | 43.0   | 40.4-45.6  | 41.7   | 29.4-54.0   |        |
| <b>New Hampshire (NPCR)</b>          |      |           |        |           |        |            |        |            |        |            |        |             |        |
| All stages                           | 56.4 | 50.4-62.5 | 55.9   | 49.8-62.1 | 27.1   | 11.1-43.0  | 28.7   | 25.5-31.9  | 28.2   | 24.9-31.4  | 20.4   | 0.0-42.3    |        |
| Localized                            | 27.3 | 24.6-30.1 | 27.1   | 24.2-29.9 | 27.1   | 11.1-43.0  | 28.7   | 25.5-31.9  | 28.2   | 24.9-31.4  | 20.4   | 0.0-42.3    |        |
| Regional                             | 16.1 | 8.5-23.8  | 15.6   | 7.9-23.3  | -      | -          | 8.1    | 1.7-14.6   | 7.4    | 1.3-13.5   | -      | -           |        |
| Distant                              | 43.8 | 37.4-50.3 | 44.7   | 38.1-51.3 | -      | -          | 40.2   | 34.3-46.2  | 40.9   | 34.7-47.0  | -      | -           |        |
| Unknown                              | 87.6 | 75.5-99.6 | 87.6   | 75.5-99.6 | -      | -          | 86.5   | 71.7-100.0 | 90.6   | 75.9-100.0 | -      | -           |        |
| <b>Rhode Island (NPCR)</b>           |      |           |        |           |        |            |        |            |        |            |        |             |        |
| All stages                           | 16.9 | 16.5-32.3 | 24.9   | 16.7-33.1 | -      | -          | 24.2   | 18.4-30.0  | 23.5   | 17.7-29.3  | -      | -           |        |
| Localized                            | 42.5 | 35.5-49.5 | 42.2   | 35.0-49.3 | -      | -          | 50.0   | 43.9-56.0  | 49.5   | 43.2-55.8  | 74.1   | 46.3-100.0  |        |
| Regional                             | 86.8 | 75.2-98.5 | 85.8   | 73.4-98.1 | -      | -          | 25.2   | 9.9-40.5   | 35.1   | 16.0-54.2  | -      | -           |        |
| Distant                              | 45.5 | 28.5-62.6 | 46.8   | 29.4-64.2 | -      | -          | -      | -          | -      | -          | -      | -           |        |
| Unknown                              | 25.8 | 17.8-33.7 | 25.6   | 17.5-33.7 | -      | -          | -      | -          | -      | -          | -      | -           |        |
| <b>Mid Atlantic</b>                  |      |           |        |           |        |            |        |            |        |            |        |             |        |
| New Jersey (NPCR/SEER)               |      |           |        |           |        |            |        |            |        |            |        |             |        |
| All stages                           | 39.2 | 37.2-41.3 | 39.9   | 37.7-42.0 | 28.9   | 23.0-34.8  | 39.4   | 37.0-41.8  | 40.4   | 37.9-42.9  | 26.6   | 20.5-32.7   |        |
| Localized                            | 84.3 | 77.9-90.7 | 83.9   | 77.4-90.5 | 95.8   | 86.5-100.0 | 85.9   | 78.8-93.1  | 86.6   | 79.2-94.0  | 62.4   | 49.3-75.5   |        |
| Regional                             | 56.0 | 50.6-61.3 | 56.9   | 51.2-62.6 | 49.3   | 30.9-67.7  | 60.5   | 54.4-66.5  | 61.7   | 55.3-68.1  | 47.1   | 31.2-63.0   |        |
| Distant                              | 23.9 | 21.6-26.2 | 24.6   | 22.2-27.1 | 13.4   | 7.9-18.9   | 24.7   | 21.9-27.5  | 25.7   | 22.8-28.7  | 12.1   | 6.3-17.9    |        |
| Unknown                              | 35.5 | 29.1-41.8 | 36.2   | 29.2-43.1 | 24.1   | 6.2-42.1   | 32.9   | 25.7-40.0  | 35.1   | 27.0-43.2  | 30.9   | 16.6-45.2   |        |
| <b>New York (NPCR)</b>               |      |           |        |           |        |            |        |            |        |            |        |             |        |
| All stages                           | 39.7 | 38.2-41.1 | 40.3   | 38.8-41.9 | 31.5   | 27.4-35.5  | 43.0   | 41.4-44.6  | 43.8   | 42.1-45.5  | 34.8   | 30.3-39.4   |        |
| Localized                            | 81.7 | 77.1-86.4 | 82.0   | 77.0-87.0 | 75.5   | 61.9-89.1  | 88.5   | 83.9-93.1  | 88.8   | 83.8-93.9  | 84.5   | 72.8-96.1   |        |
| Regional                             | 49.8 | 46.4-53.2 | 51.4   | 47.7-55.1 | 36.4   | 27.0-45.8  | 59.4   | 55.4-63.4  | 60.3   | 56.0-64.5  | 45.4   | 33.7-57.1   |        |
| Distant                              | 26.8 | 25.0-28.6 | 27.4   | 25.4-29.3 | 21.9   | 16.8-27.0  | 28.5   | 26.6-30.5  | 29.6   | 27.5-31.7  | 18.8   | 14.0-23.7   |        |
| Unknown                              | 26.7 | 23.3-30.1 | 26.1   | 22.4-29.9 | 23.2   | 17.0-29.3  | 39.4   | 34.4-44.3  | 37.4   | 32.1-42.7  | 49.4   | 36.2-62.6   |        |
| <b>Pennsylvania (NPCR)</b>           |      |           |        |           |        |            |        |            |        |            |        |             |        |
| All stages                           | 39.8 | 38.2-41.5 | 40.1   | 38.3-41.8 | 27.3   | 21.4-33.3  | 40.2   | 38.4-42.0  | 40.4   | 38.5-42.2  | 38.1   | 30.9-45.3   |        |
| Localized                            | 86.6 | 81.4-91.9 | 85.7   | 80.2-91.1 | 88.3   | 76.2-100.0 | 84.6   | 76.7-92.4  | 84.0   | 76.0-92.0  | 97.3   | 89.1-100.0  |        |
| Regional                             | 52.8 | 48.7-56.9 | 53.3   | 49.1-57.6 | 42.0   | 25.2-58.8  | 62.1   | 57.6-66.5  | 62.8   | 58.4-67.2  | 42.3   | 23.7-60.8   |        |



**SUPPORTING TABLE 3. Continued**

| SEER Summary Stage 2000 <sup>a</sup> | 2001-2003 |            |        |            |        |            | 2004-2009 |            |        |            |        |            |
|--------------------------------------|-----------|------------|--------|------------|--------|------------|-----------|------------|--------|------------|--------|------------|
|                                      | All Races |            | White  |            | Black  |            | All Races |            | White  |            | Black  |            |
|                                      | NS (%)    | 95% CI     | NS (%) | 95% CI     | NS (%) | 95% CI     | NS (%)    | 95% CI     | NS (%) | 95% CI     | NS (%) | 95% CI     |
| Distant                              | 23.4      | 21.5-25.4  | 23.4   | 21.4-25.5  | 16.0   | 9.8-22.2   | 26.0      | 23.9-28.1  | 25.9   | 23.7-28.0  | 26.6   | 20.5-36.6  |
| Unknown                              | 31.7      | 26.1-37.3  | 33.4   | 27.4-39.4  | 14.6   | 0.0-29.4   | 32.0      | 25.8-38.3  | 33.5   | 26.8-40.3  | 19.5   | 2.4-36.6   |
| <b>SOUTH</b>                         |           |            |        |            |        |            |           |            |        |            |        |            |
| <b>South Atlantic</b>                |           |            |        |            |        |            |           |            |        |            |        |            |
| Delaware (NPCR)                      | 45.4      | 37.8-53.0  | 46.8   | 38.7-54.9  | 46.5   | 27.3-65.6  | 44.3      | 37.0-51.6  | 47.0   | 39.1-54.9  | 23.0   | 2.8-43.3   |
| Localized                            | 92.4      | 78.6-100.0 | 91.0   | 75.5-100.0 | -      | -          | 90.2      | 75.8-100.0 | 88.5   | 72.5-100.0 | -      | -          |
| Regional                             | 64.4      | 48.8-79.9  | 62.4   | 45.4-79.4  | -      | -          | 65.6      | 49.9-81.4  | 66.4   | 50.4-82.5  | -      | -          |
| Distant                              | 26.1      | 17.6-34.6  | 27.0   | 17.7-36.3  | 22.0   | 1.9-42.1   | 30.9      | 23.2-38.5  | 34.7   | 26.2-43.3  | 8.4    | 0.0-20.1   |
| Unknown                              | 40.5      | 19.0-62.0  | 41.4   | 18.1-64.7  | -      | -          | 32.4      | 7.7-57.1   | 28.1   | 3.3-52.9   | -      | -          |
| All stages                           | 40.9      | 39.4-42.4  | 41.7   | 40.1-43.3  | 29.6   | 24.6-34.7  | 47.3      | 45.8-48.9  | 47.8   | 46.2-49.4  | 39.6   | 34.4-44.8  |
| Localized                            | 84.7      | 80.2-89.1  | 84.1   | 79.5-88.6  | 94.0   | 85.7-100.0 | 89.0      | 84.7-93.3  | 88.8   | 84.3-93.2  | 95.2   | 85.5-100.0 |
| Regional                             | 56.2      | 52.0-60.4  | 57.0   | 52.7-61.4  | 46.9   | 35.8-58.1  | 65.5      | 61.7-69.3  | 66.1   | 62.0-70.1  | 52.5   | 40.4-64.6  |
| Distant                              | 27.2      | 25.5-29.0  | 28.1   | 26.3-29.9  | 16.4   | 11.5-21.3  | 34.4      | 32.5-36.4  | 34.7   | 32.6-36.7  | 28.9   | 23.0-34.8  |
| Unknown                              | 39.6      | 35.0-44.2  | 41.8   | 36.9-46.7  | 19.3   | 8.9-29.7   | 47.0      | 42.3-51.6  | 48.4   | 43.4-53.4  | 36.5   | 25.2-47.7  |
| All stages                           | 39.2      | 36.7-41.7  | 40.8   | 38.0-43.5  | 31.9   | 26.5-37.2  | 37.1      | 34.6-39.7  | 39.0   | 36.1-41.8  | 31.3   | 26.0-36.7  |
| Localized                            | 83.6      | 75.0-92.1  | 81.6   | 72.9-90.4  | 88.9   | 77.3-100.0 | 84.6      | 75.8-93.5  | 84.7   | 73.5-96.0  | 74.4   | 59.5-89.3  |
| Regional                             | 62.5      | 56.1-69.0  | 63.0   | 55.9-70.1  | 60.5   | 46.5-74.6  | 53.5      | 46.9-60.1  | 54.5   | 47.0-61.9  | 45.3   | 33.9-56.7  |
| Distant                              | 24.4      | 21.7-27.1  | 27.1   | 23.9-30.3  | 13.1   | 8.8-17.4   | 24.3      | 21.3-27.2  | 26.9   | 23.5-30.3  | 16.0   | 10.6-21.4  |
| Unknown                              | 27.8      | 20.7-34.8  | 27.6   | 19.6-35.5  | 29.2   | 12.6-45.9  | 22.1      | 14.9-29.4  | 21.9   | 14.2-29.6  | 30.8   | 14.5-47.0  |
| All stages                           | 39.3      | 36.2-42.4  | 40.8   | 37.4-44.3  | 31.6   | 24.2-38.9  | 37.8      | 34.7-40.9  | 41.4   | 37.9-45.0  | 21.3   | 15.0-27.6  |
| Localized                            | -         | -          | -      | -          | -      | -          | -         | -          | -      | -          | -      | -          |
| Regional                             | -         | -          | -      | -          | -      | -          | -         | -          | -      | -          | -      | -          |
| Distant                              | -         | -          | -      | -          | -      | -          | -         | -          | -      | -          | -      | -          |
| Unknown                              | -         | -          | -      | -          | -      | -          | -         | -          | -      | -          | -      | -          |
| All stages                           | 39.3      | 37.0-41.6  | 40.3   | 37.8-42.7  | 33.1   | 26.8-39.5  | 43.5      | 41.0-45.9  | 45.3   | 42.6-48.0  | 30.8   | 25.8-35.8  |
| Localized                            | 73.3      | 66.5-80.1  | 73.4   | 66.1-80.7  | 76.1   | 61.9-90.2  | 81.8      | 74.5-89.1  | 83.7   | 76.1-91.2  | 70.3   | 54.3-86.3  |
| Regional                             | 47.4      | 42.0-52.8  | 47.8   | 42.2-53.3  | 46.5   | 30.8-62.3  | 64.4      | 58.6-70.2  | 65.6   | 59.2-72.1  | 50.0   | 38.0-62.0  |
| Distant                              | 22.6      | 19.9-25.4  | 24.4   | 21.3-27.4  | 11.8   | 6.5-17.1   | 30.9      | 27.9-33.9  | 33.1   | 29.8-36.5  | 18.9   | 13.1-24.7  |
| Unknown                              | 42.2      | 34.5-49.9  | 43.8   | 35.3-52.3  | 32.0   | 11.8-52.3  | 26.3      | 18.6-34.1  | 27.7   | 19.3-36.1  | 18.9   | 4.3-33.5   |
| All stages                           | 40.6      | 37.3-43.9  | 42.5   | 38.8-46.2  | 31.8   | 25.0-38.6  | 41.7      | 38.2-45.2  | 43.6   | 39.7-47.4  | 27.4   | 19.7-35.2  |
| Localized                            | 81.7      | 72.1-91.4  | 84.6   | 74.8-94.3  | 74.3   | 57.4-91.1  | 82.4      | 72.7-92.1  | 84.3   | 73.8-94.8  | 86.2   | 73.4-99.0  |
| Regional                             | 49.6      | 41.9-57.4  | 52.1   | 43.9-60.4  | 29.8   | 11.8-47.7  | 62.8      | 54.2-71.4  | 62.6   | 53.3-71.8  | 67.9   | 49.0-86.7  |
| Distant                              | 26.5      | 22.4-30.5  | 27.3   | 22.7-31.8  | 23.6   | 15.7-31.6  | 29.5      | 25.3-33.7  | 32.0   | 27.5-36.5  | 15.5   | 8.7-22.2   |
| Unknown                              | 31.7      | 23.3-40.0  | 31.8   | 20.4-43.2  | 34.2   | 16.8-51.5  | 19.4      | 12.1-26.7  | 21.2   | 13.2-29.3  | 20.5   | 6.0-35.0   |
| All stages                           | 33.3      | 29.2-37.5  | 32.8   | 28.6-37.0  | 36.6   | 11.5-61.6  | 33.4      | 28.6-38.2  | 33.1   | 28.2-38.0  | 33.5   | 8.1-58.9   |
| Localized                            | 75.4      | 63.6-87.3  | 72.5   | 60.3-84.6  | -      | -          | 81.8      | 68.7-95.0  | 82.2   | 68.5-95.9  | -      | -          |
| Regional                             | 38.2      | 29.3-47.1  | 39.0   | 30.1-48.0  | -      | -          | 44.4      | 34.4-54.4  | 43.9   | 33.8-54.1  | -      | -          |
| Distant                              | 18.9      | 13.9-23.9  | 18.0   | 13.0-22.9  | -      | -          | 21.5      | 15.6-27.3  | 21.5   | 15.6-27.4  | -      | -          |
| Unknown                              | 16.8      | 7.7-25.9   | 17.7   | 8.1-27.3   | -      | -          | 18.7      | 10.0-27.4  | 18.0   | 9.7-26.4   | -      | -          |
| All stages                           | 37.9      | 34.7-41.1  | 40.2   | 36.6-43.8  | 24.5   | 18.1-30.9  | 36.2      | 32.9-39.4  | 37.3   | 33.7-41.0  | 27.3   | 21.3-33.4  |
| Localized                            | 68.3      | 59.1-77.4  | 71.9   | 61.2-82.5  | 66.1   | 45.5-86.8  | 74.5      | 63.3-85.7  | 72.2   | 60.0-84.3  | 76.3   | 57.9-94.8  |
| Regional                             | 48.1      | 40.6-55.6  | 50.0   | 41.8-58.1  | 35.7   | 18.1-53.2  | 59.2      | 51.3-67.1  | 57.1   | 48.3-65.9  | 63.0   | 47.7-78.3  |
| Unknown                              | -         | -          | -      | -          | -      | -          | -         | -          | -      | -          | -      | -          |

SUPPORTING TABLE 3. Continued

| SEER Summary Stage 2000 <sup>a</sup> | 2001-2003 |           |        |            |        |            | 2004-2009 |           |        |           |        |            |
|--------------------------------------|-----------|-----------|--------|------------|--------|------------|-----------|-----------|--------|-----------|--------|------------|
|                                      | All Races |           | White  |            | Black  |            | All Races |           | White  |           | Black  |            |
|                                      | NS (%)    | 95% CI    | NS (%) | 95% CI     | NS (%) | 95% CI     | NS (%)    | 95% CI    | NS (%) | 95% CI    | NS (%) | 95% CI     |
| Distant                              | 24.1      | 20.3-27.9 | 25.6   | 21.4-29.8  | 15.5   | 8.4-22.6   | 22.9      | 19.3-26.6 | 25.1   | 21.0-29.3 | 11.8   | 7.4-16.2   |
| Unknown                              | 26.2      | 15.7-36.7 | 28.6   | 15.3-41.9  | 15.7   | 1.0-30.5   | 27.1      | 18.2-36.0 | 20.5   | 7.5-33.5  | 28.7   | 9.9-47.6   |
| All stages                           | 37.4      | 34.1-40.7 | 37.7   | 34.3-41.1  | 34.7   | 19.7-49.6  | 36.4      | 32.8-39.9 | 36.8   | 33.1-40.5 | 16.5   | 10.1-22.9  |
| Localized                            | 77.9      | 64.8-91.0 | 77.4   | 64.2-90.6  | -      | -          | 75.1      | 63.4-86.8 | 75.2   | 63.5-86.9 | 81.2   | 57.3-100.0 |
| Regional                             | 53.2      | 45.0-61.4 | 53.0   | 44.6-61.4  | -      | -          | 61.1      | 51.8-70.4 | 61.5   | 52.0-71.0 | 48.8   | 7.3-90.2   |
| Distant                              | 24.3      | 20.5-28.1 | 24.6   | 20.7-28.6  | 17.2   | 2.5-31.9   | 19.6      | 15.6-23.6 | 20.0   | 15.8-24.2 | 6.5    | 0.0-16.0   |
| Unknown                              | 28.1      | 18.4-37.8 | 27.9   | 17.7-38.0  | -      | -          | 32.2      | 23.6-40.8 | 33.2   | 24.3-42.1 | -      | -          |
| All stages                           | 35.9      | 28.5-43.2 | 38.1   | 29.3-46.9  | 37.2   | 23.3-51.1  | 40.3      | 35.6-45.0 | 44.4   | 38.8-49.9 | 23.5   | 18.4-28.6  |
| Localized                            | 76.9      | 57.0-96.9 | 74.2   | 48.3-100.0 | 80.9   | 57.1-100.0 | 70.1      | 53.8-86.4 | 68.5   | 50.1-86.8 | 87.9   | 73.1-100.0 |
| Regional                             | 56.3      | 36.5-76.1 | 56.2   | 32.0-80.3  | -      | -          | 54.2      | 44.5-64.0 | 60.2   | 49.4-71.1 | 44.2   | 27.4-61.7  |
| Distant                              | 20.1      | 13.3-27.0 | 20.7   | 10.5-30.9  | 16.7   | 2.3-31.2   | 28.4      | 22.7-34.1 | 33.3   | 26.3-40.3 | 13.2   | 7.5-18.8   |
| Unknown                              | 45.1      | 26.3-64.0 | 50.2   | 28.2-72.1  | -      | -          | 47.7      | 35.8-59.5 | 44.1   | 27.9-60.2 | 44.2   | 21.0-67.3  |
| All stages                           | 37.2      | 32.2-42.2 | 37.9   | 32.5-43.3  | 33.5   | 19.2-47.8  | 40.5      | 37.3-43.7 | 41.4   | 38.1-44.8 | 30.6   | 22.0-39.2  |
| Localized                            | 77.9      | 66.2-89.5 | 76.4   | 64.4-88.4  | -      | -          | 75.3      | 64.5-86.1 | 77.0   | 65.9-88.0 | 67.4   | 46.5-88.3  |
| Regional                             | 38.3      | 29.6-47.1 | 41.5   | 31.9-51.1  | 9.8    | 0.0-24.5   | 59.8      | 52.7-66.9 | 61.7   | 54.5-68.8 | 52.0   | 31.6-72.4  |
| Distant                              | 21.8      | 15.8-27.8 | 22.1   | 15.7-28.4  | 21.5   | 4.1-38.8   | 24.7      | 20.8-28.6 | 24.8   | 20.7-29.0 | 20.8   | 14.0-27.6  |
| Unknown                              | 37.2      | 19.9-54.4 | 34.0   | 15.6-52.5  | -      | -          | 27.4      | 17.7-37.1 | 29.2   | 19.6-38.8 | 37.6   | 0.0-76.6   |
| <b>West South Central</b>            |           |           |        |            |        |            |           |           |        |           |        |            |
| Louisiana                            | 34.9      | 31.6-38.2 | 37.4   | 33.7-41.1  | 24.8   | 18.5-31.2  | 35.5      | 31.8-39.1 | 38.5   | 34.3-42.7 | 16.8   | 11.7-21.8  |
| Localized                            | 78.6      | 68.5-88.7 | 81.0   | 69.5-92.4  | 78.4   | 59.4-97.5  | 82.9      | 72.4-93.3 | 89.3   | 79.6-99.0 | 69.7   | 48.6-90.7  |
| Regional                             | 52.1      | 42.3-61.9 | 57.1   | 46.2-68.1  | 39.2   | 19.1-59.4  | 48.4      | 39.7-57.2 | 53.0   | 43.4-62.6 | 22.7   | 9.4-35.9   |
| Distant                              | 22.7      | 19.2-26.3 | 25.5   | 21.1-29.8  | 11.5   | 6.6-16.3   | 23.0      | 18.8-27.1 | 25.6   | 20.8-30.4 | 16.7   | 10.1-23.2  |
| Unknown                              | 23.2      | 11.7-34.7 | 13.5   | 4.2-22.8   | 44.5   | 16.3-72.7  | 26.7      | 19.7-33.8 | 24.2   | 17.2-31.2 | 28.1   | 8.6-47.5   |
| All stages                           | 40.4      | 37.0-43.9 | 40.1   | 36.4-43.8  | 37.5   | 22.0-53.1  | 41.3      | 37.3-45.2 | 42.5   | 38.2-46.7 | 37.8   | 27.0-48.5  |
| Localized                            | 81.4      | 70.8-92.0 | 79.7   | 67.6-91.9  | -      | -          | 89.3      | 78.9-99.6 | 88.8   | 78.2-99.4 | -      | -          |
| Regional                             | 48.9      | 42.0-55.7 | 49.6   | 42.4-56.8  | 28.9   | 3.0-54.9   | 51.8      | 42.4-61.2 | 54.5   | 44.3-64.7 | 41.0   | 7.4-74.6   |
| Distant                              | 26.5      | 22.2-30.9 | 26.7   | 22.1-31.4  | 29.1   | 10.0-48.1  | 27.6      | 23.1-32.2 | 28.1   | 23.3-33.0 | 30.9   | 11.4-50.4  |
| Unknown                              | 28.3      | 18.9-37.8 | 27.8   | 17.8-37.8  | -      | -          | 37.8      | 28.6-47.0 | 38.1   | 28.7-47.5 | -      | -          |
| All stages                           | 39.5      | 37.8-41.3 | 40.8   | 38.9-42.6  | 24.4   | 19.5-29.2  | 39.8      | 38.0-41.6 | 40.7   | 38.8-42.7 | 25.5   | 20.5-30.5  |
| Localized                            | 88.7      | 82.7-94.7 | 89.2   | 83.4-95.1  | 78.0   | 59.1-96.9  | 88.4      | 82.1-94.6 | 90.1   | 83.9-96.3 | 86.2   | 73.4-99.0  |
| Regional                             | 44.9      | 40.4-49.3 | 46.6   | 41.9-51.3  | 28.7   | 15.2-42.2  | 57.9      | 52.4-63.4 | 60.1   | 54.3-66.0 | 34.0   | 21.7-46.3  |
| Distant                              | 23.5      | 21.5-25.4 | 24.7   | 22.6-26.8  | 10.5   | 6.4-14.7   | 26.7      | 24.5-28.8 | 27.4   | 25.1-29.6 | 16.0   | 10.9-21.1  |
| Unknown                              | 48.3      | 43.5-53.0 | 50.0   | 44.8-55.2  | 37.4   | 27.4-47.4  | 38.6      | 33.6-43.7 | 39.3   | 34.1-44.5 | 18.6   | 12.5-24.7  |
| <b>MIDWEST</b>                       |           |           |        |            |        |            |           |           |        |           |        |            |
| <b>East North Central</b>            |           |           |        |            |        |            |           |           |        |           |        |            |
| Michigan                             | 38.1      | 36.1-40.2 | 38.6   | 36.4-40.8  | 27.9   | 21.5-34.3  | 39.7      | 37.5-41.9 | 40.3   | 37.9-42.6 | 32.2   | 25.6-38.8  |
| Localized                            | 85.8      | 79.3-92.3 | 86.9   | 80.1-93.6  | 81.6   | 67.6-95.6  | 92.4      | 85.9-98.9 | 92.8   | 85.9-99.8 | 93.6   | 83.8-100.0 |
| Regional                             | 50.1      | 45.0-55.1 | 51.5   | 46.2-56.8  | 36.8   | 19.1-54.4  | 51.0      | 45.9-56.1 | 51.8   | 46.7-56.9 | 43.9   | 30.1-57.7  |
| Distant                              | 23.4      | 21.0-25.8 | 23.8   | 21.2-26.4  | 14.3   | 8.6-19.9   | 27.8      | 24.5-31.2 | 28.5   | 25.0-32.0 | 20.4   | 12.7-28.1  |
| Unknown                              | 30.4      | 24.9-35.9 | 28.7   | 23.1-34.3  | 28.0   | 8.7-47.3   | 28.6      | 24.8-32.5 | 29.5   | 25.3-32.7 | 25.2   | 15.8-34.6  |
| All stages                           | 39.2      | 37.2-41.2 | 39.7   | 37.6-41.8  | 30.1   | 23.2-36.9  | 39.5      | 37.4-41.6 | 40.0   | 37.7-42.2 | 31.2   | 24.8-37.5  |
| Localized                            | 86.9      | 80.8-93.0 | 87.2   | 81.0-93.4  | 78.9   | 62.5-95.3  | 91.1      | 84.5-97.7 | 90.6   | 83.5-97.7 | 90.0   | 78.5-100.0 |
| Regional                             | 47.3      | 43.0-51.6 | 47.8   | 43.3-52.4  | 39.5   | 24.6-54.4  | 65.0      | 59.3-70.7 | 66.0   | 60.0-72.0 | 43.7   | 29.3-58.0  |

**SUPPORTING TABLE 3. Continued**

| SEER Summary Stage 2000 <sup>a</sup> | 2001-2003 |            |        |            |        |           | 2004-2009 |            |        |            |        |           |
|--------------------------------------|-----------|------------|--------|------------|--------|-----------|-----------|------------|--------|------------|--------|-----------|
|                                      | All Races |            | White  |            | Black  |           | All Races |            | White  |            | Black  |           |
|                                      | NS (%)    | 95% CI     | NS (%) | 95% CI     | NS (%) | 95% CI    | NS (%)    | 95% CI     | NS (%) | 95% CI     | NS (%) | 95% CI    |
| Wisconsin (NPCR)                     | 21.6      | 19.1-24.2  | 21.7   | 19.0-24.3  | 20.7   | 12.1-29.2 | 26.5      | 23.8-29.1  | 26.9   | 24.1-29.6  | 23.8   | 16.0-31.6 |
| Unknown                              | 25.3      | 20.8-29.7  | 25.6   | 20.9-30.3  | 20.7   | 7.6-33.7  | 10.2      | 6.7-13.7   | 9.8    | 5.9-13.7   | 11.8   | 0.6-23.0  |
| All stages                           | 42.1      | 39.3-44.9  | 41.8   | 38.9-44.6  | 47.6   | 31.2-64.0 | 40.8      | 37.8-43.8  | 41.5   | 38.4-44.5  | 35.1   | 23.9-46.3 |
| Localized                            | -         | -          | -      | -          | -      | -         | -         | -          | -      | -          | -      | -         |
| Regional                             | -         | -          | -      | -          | -      | -         | -         | -          | -      | -          | -      | -         |
| Distant                              | -         | -          | -      | -          | -      | -         | -         | -          | -      | -          | -      | -         |
| Unknown                              | -         | -          | -      | -          | -      | -         | -         | -          | -      | -          | -      | -         |
| <b>West North Central</b>            |           |            |        |            |        |           |           |            |        |            |        |           |
| Iowa (SEER)                          | 38.4      | 34.9-41.9  | 38.8   | 35.3-42.3  | 39.2   | 17.1-61.2 | 34.7      | 31.0-38.4  | 35.0   | 31.3-38.7  | 18.0   | 0.0-42.1  |
| Localized                            | 82.1      | 71.1-93.0  | 81.9   | 70.8-93.0  | -      | -         | 83.4      | 75.1-91.7  | 83.8   | 75.4-92.2  | -      | -         |
| Regional                             | 64.4      | 55.0-73.9  | 64.7   | 55.2-74.1  | -      | -         | 58.8      | 49.1-68.4  | 58.8   | 49.1-68.4  | -      | -         |
| Distant                              | 23.8      | 19.9-27.7  | 24.3   | 20.4-28.2  | -      | -         | 18.4      | 14.6-22.2  | 18.4   | 14.4-22.3  | 0.0    | 0.0-0.2   |
| Unknown                              | 9.0       | 1.6-16.5   | 9.1    | 1.6-16.7   | -      | -         | 13.5      | 4.2-22.7   | 13.5   | 4.2-22.7   | -      | -         |
| All stages                           | 36.4      | 31.7-41.2  | 36.4   | 31.6-41.2  | -      | -         | 38.5      | 33.7-43.3  | 39.0   | 34.1-43.8  | 24.8   | 0.1-49.5  |
| Localized                            | 83.2      | 70.0-96.5  | 84.4   | 71.3-97.6  | -      | -         | 91.3      | 78.9-100.0 | 91.3   | 78.9-100.0 | -      | -         |
| Regional                             | 53.5      | 41.8-65.2  | 53.9   | 42.0-65.8  | -      | -         | 60.3      | 47.9-72.7  | 60.6   | 48.2-73.0  | -      | -         |
| Distant                              | 21.4      | 16.3-26.4  | 21.2   | 16.2-26.3  | -      | -         | 24.4      | 19.0-29.8  | 24.9   | 19.4-30.4  | 19.0   | 0.0-43.7  |
| Unknown                              | 18.1      | 7.6-28.6   | 15.6   | 5.3-25.9   | -      | -         | 19.3      | 6.6-32.0   | 17.4   | 4.4-30.5   | -      | -         |
| <b>WEST</b>                          |           |            |        |            |        |           |           |            |        |            |        |           |
| <b>Mountain</b>                      |           |            |        |            |        |           |           |            |        |            |        |           |
| Colorado (NPCR)                      | 40.5      | 37.1-44.0  | 40.5   | 37.0-44.0  | 39.2   | 17.1-61.2 | 43.5      | 40.0-46.9  | 43.4   | 39.9-46.9  | 50.0   | 31.5-68.5 |
| Localized                            | 91.0      | 82.4-99.6  | 91.4   | 82.8-100.0 | -      | -         | 87.7      | 76.8-98.6  | 86.6   | 75.5-97.8  | -      | -         |
| Regional                             | 56.6      | 47.8-65.5  | 56.5   | 47.3-65.7  | -      | -         | 67.4      | 59.1-75.8  | 66.5   | 58.0-75.1  | -      | -         |
| Distant                              | 26.1      | 22.2-30.0  | 26.3   | 22.3-30.2  | -      | -         | 28.3      | 24.1-32.4  | 28.4   | 24.2-32.6  | 35.0   | 12.3-57.8 |
| Unknown                              | 24.6      | 15.2-34.0  | 20.5   | 10.4-30.6  | -      | -         | 39.7      | 30.4-48.9  | 38.7   | 29.3-48.0  | -      | -         |
| All stages                           | 38.4      | 32.7-44.1  | 38.6   | 32.8-44.3  | -      | -         | 38.8      | 32.4-45.2  | 38.2   | 31.6-44.7  | -      | -         |
| Localized                            | 91.9      | 78.4-100.0 | 91.6   | 77.7-100.0 | -      | -         | 89.1      | 73.6-100.0 | 89.1   | 73.6-100.0 | -      | -         |
| Regional                             | 72.8      | 59.1-86.6  | 72.8   | 59.1-86.6  | -      | -         | 53.4      | 40.0-66.9  | 54.4   | 40.7-68.2  | -      | -         |
| Distant                              | 23.5      | 17.3-29.7  | 23.8   | 17.4-30.1  | -      | -         | 23.3      | 15.6-30.9  | 23.4   | 15.7-31.0  | -      | -         |
| Unknown                              | 22.2      | 5.0-39.4   | 18.7   | 2.3-35.0   | -      | -         | 4.0       | 0.0-10.3   | 4.4    | 0.0-11.3   | -      | -         |
| All stages                           | 39.1      | 32.3-45.8  | 40.0   | 33.1-46.8  | -      | -         | 39.4      | 33.1-45.7  | 40.0   | 33.6-46.3  | -      | -         |
| Localized                            | 82.1      | 67.4-96.8  | 86.2   | 71.7-100.0 | -      | -         | 94.1      | 82.5-100.0 | 94.0   | 82.4-100.0 | -      | -         |
| Regional                             | 56.7      | 41.2-72.2  | 56.0   | 40.0-72.0  | -      | -         | 50.6      | 33.7-67.5  | 50.4   | 33.4-67.3  | -      | -         |
| Distant                              | 24.7      | 17.1-32.2  | 25.3   | 17.6-33.0  | -      | -         | 28.8      | 21.3-36.2  | 30.2   | 22.9-37.6  | -      | -         |
| Unknown                              | 24.1      | 4.3-43.9   | 24.1   | 4.3-43.9   | -      | -         | 23.5      | 7.8-39.2   | 23.1   | 7.6-38.6   | -      | -         |
| All stages                           | 40.0      | 35.0-45.0  | 40.2   | 34.9-45.5  | -      | -         | 42.3      | 36.9-47.8  | 41.2   | 35.4-47.0  | 50.3   | 16.6-84.1 |
| Localized                            | 83.3      | 71.2-95.3  | 80.9   | 67.7-94.2  | -      | -         | 71.3      | 60.3-82.3  | 67.3   | 55.6-79.0  | -      | -         |
| Regional                             | 58.4      | 46.0-70.8  | 56.4   | 43.6-69.1  | -      | -         | 60.0      | 44.2-76.6  | 65.4   | 54.1-76.6  | -      | -         |
| Distant                              | 26.8      | 21.5-32.1  | 27.6   | 21.9-33.2  | -      | -         | 30.4      | 24.2-36.5  | 30.9   | 24.3-37.4  | -      | -         |
| Unknown                              | 37.6      | 20.7-54.5  | 40.5   | 22.6-58.5  | -      | -         | 27.7      | 11.8-43.5  | 23.3   | 7.1-39.4   | -      | -         |
| All stages                           | 36.1      | 31.4-40.9  | 36.3   | 31.5-41.1  | -      | -         | 41.5      | 36.9-46.1  | 41.8   | 37.1-46.6  | -      | -         |
| Localized                            | 69.6      | 57.9-81.3  | 69.6   | 57.9-81.3  | -      | -         | 85.2      | 72.8-97.6  | 85.6   | 73.3-98.0  | -      | -         |
| Regional                             | 67.4      | 53.9-80.8  | 67.1   | 53.5-80.6  | -      | -         | 63.2      | 49.1-77.3  | 63.2   | 49.1-77.3  | -      | -         |

SUPPORTING TABLE 3. Continued

| SEER Summary Stage 2000 <sup>a</sup> | 2001-2003 |            |        |            |        |           | 2004-2009 |            |        |            |        |           |
|--------------------------------------|-----------|------------|--------|------------|--------|-----------|-----------|------------|--------|------------|--------|-----------|
|                                      | All Races |            | White  |            | Black  |           | All Races |            | White  |            | Black  |           |
|                                      | NS (%)    | 95% CI     | NS (%) | 95% CI     | NS (%) | 95% CI    | NS (%)    | 95% CI     | NS (%) | 95% CI     | NS (%) | 95% CI    |
| Distant                              | 22.5      | 17.6-27.5  | 22.7   | 17.7-27.8  | -      | -         | 28.4      | 22.9-33.9  | 28.1   | 22.5-33.7  | -      | -         |
| Unknown                              | 8.5       | 0.0-21.8   | 8.5    | 0.0-21.8   | -      | -         | 10.1      | 0.0-22.2   | 11.9   | 0.0-26.1   | -      | -         |
| All stages                           | 38.4      | 29.6-47.2  | 38.3   | 29.5-47.1  | -      | -         | 35.8      | 26.3-45.3  | 35.7   | 26.2-45.2  | -      | -         |
| Localized                            | 89.4      | 74.4-100.0 | 89.4   | 74.4-100.0 | -      | -         | 90.0      | 77.3-100.0 | 89.8   | 76.6-100.0 | -      | -         |
| Regional                             | 71.0      | 50.1-91.9  | 71.0   | 50.1-91.9  | -      | -         | 65.2      | 44.1-86.3  | 65.2   | 44.1-86.3  | -      | -         |
| Distant                              | 19.8      | 9.7-29.8   | 18.7   | 8.8-28.7   | -      | -         | 19.1      | 10.3-28.0  | 19.1   | 10.3-28.0  | -      | -         |
| Unknown                              | 44.0      | 16.5-71.4  | 44.0   | 16.5-71.4  | -      | -         | 13.6      | 0.0-32.3   | 13.6   | 0.0-32.3   | -      | -         |
| <b>Pacific</b>                       |           |            |        |            |        |           |           |            |        |            |        |           |
| Alaska (NPCR)                        | 34.9      | 25.2-44.7  | 29.3   | 20.2-38.4  | -      | -         | 45.1      | 35.2-54.9  | 51.4   | 40.2-62.5  | -      | -         |
| Localized                            | 81.7      | 61.5-100.0 | 77.0   | 53.9-100.0 | -      | -         | 87.8      | 63.5-100.0 | 100.0  | 91.9-100.0 | -      | -         |
| Regional                             | 35.4      | 11.9-58.9  | 39.9   | 14.1-65.6  | -      | -         | 73.9      | 56.5-91.4  | 69.4   | 48.6-90.1  | -      | -         |
| Distant                              | 29.4      | 16.8-42.0  | 29.5   | 15.5-43.5  | -      | -         | 32.4      | 23.6-41.1  | 37.6   | 26.9-48.3  | -      | -         |
| Unknown                              | -         | -          | -      | -          | -      | -         | 55.8      | 30.3-81.4  | 64.1   | 34.6-93.5  | -      | -         |
| All stages                           | 39.6      | 38.4-40.8  | 39.7   | 38.5-41.0  | 24.8   | 20.0-29.6 | 40.5      | 39.2-41.8  | 40.6   | 39.3-42.0  | 29.8   | 24.8-34.8 |
| Localized                            | 89.9      | 85.6-94.1  | 90.4   | 85.8-95.0  | 83.4   | 70.4-96.5 | 81.5      | 76.9-86.0  | 82.3   | 77.5-87.0  | 75.1   | 56.0-94.3 |
| Regional                             | 63.7      | 60.3-67.1  | 64.8   | 61.1-68.5  | 55.6   | 38.9-72.2 | 67.6      | 64.0-71.1  | 68.4   | 64.5-72.2  | 44.9   | 31.3-58.5 |
| Distant                              | 26.9      | 25.6-28.2  | 27.4   | 26.0-28.8  | 16.8   | 11.8-21.7 | 27.2      | 25.7-28.7  | 27.6   | 26.0-29.2  | 18.9   | 13.5-24.4 |
| Unknown                              | 23.1      | 18.7-27.6  | 23.5   | 18.5-28.5  | 7.1    | 0.0-15.5  | 20.8      | 16.7-24.8  | 20.5   | 16.2-24.8  | 17.8   | 5.4-30.2  |
| All stages                           | 42.7      | 36.3-49.1  | 40.2   | 28.7-51.8  | -      | -         | 41.2      | 35.1-47.2  | 36.4   | 26.3-46.4  | -      | -         |
| Localized                            | 94.0      | 83.5-100.0 | -      | -          | -      | -         | 87.2      | 73.7-100.0 | 98.8   | 86.7-100.0 | -      | -         |
| Regional                             | 68.1      | 57.2-78.9  | 55.6   | 27.1-84.0  | -      | -         | 51.2      | 41.2-61.3  | 48.1   | 22.5-73.7  | -      | -         |
| Distant                              | 23.9      | 17.2-30.6  | 33.7   | 20.4-47.0  | -      | -         | 29.4      | 22.6-36.3  | 26.3   | 16.1-36.4  | -      | -         |
| Unknown                              | 9.4       | 0.0-23.4   | -      | -          | -      | -         | 11.3      | 0.0-26.6   | -      | -          | -      | -         |
| All stages                           | 39.7      | 36.4-43.0  | 39.2   | 35.9-42.6  | -      | -         | 40.5      | 37.0-44.0  | 39.7   | 36.2-43.3  | 41.6   | 9.5-73.8  |
| Localized                            | 82.6      | 72.8-92.4  | 82.2   | 72.4-92.1  | -      | -         | 91.6      | 81.0-100.0 | 87.8   | 76.8-98.7  | -      | -         |
| Regional                             | 55.7      | 47.6-63.8  | 55.6   | 47.3-63.8  | -      | -         | 62.3      | 52.8-71.7  | 61.5   | 52.0-70.9  | -      | -         |
| Distant                              | 26.3      | 22.5-30.1  | 25.7   | 21.8-29.5  | -      | -         | 27.0      | 22.9-31.0  | 27.1   | 22.9-31.3  | 26.0   | 0.0-55.6  |
| Unknown                              | 24.8      | 13.5-36.1  | 22.9   | 11.7-34.1  | -      | -         | 6.6       | 0.2-13.0   | 7.3    | 0.5-14.2   | -      | -         |
| All stages                           | 40.8      | 38.2-43.3  | 40.5   | 37.8-43.2  | 27.4   | 12.3-42.5 | 41.2      | 38.4-44.0  | 40.3   | 37.4-43.2  | 48.3   | 29.3-67.4 |
| Localized                            | 90.6      | 81.2-99.9  | 89.6   | 79.8-99.4  | -      | -         | 92.8      | 84.1-100.0 | 91.5   | 81.7-100.0 | -      | -         |
| Regional                             | 59.0      | 52.4-65.7  | 59.0   | 52.1-66.0  | 47.2   | 18.1-76.3 | 67.4      | 59.9-74.8  | 67.8   | 60.3-75.3  | -      | -         |
| Distant                              | 28.6      | 25.7-31.5  | 28.6   | 25.6-31.7  | 15.6   | 0.8-30.3  | 29.5      | 26.2-32.7  | 28.8   | 25.5-32.2  | 38.1   | 15.2-61.0 |
| Unknown                              | 17.1      | 7.7-26.4   | 17.5   | 7.6-27.5   | -      | -         | 21.3      | 13.3-29.2  | 20.4   | 12.8-28.1  | -      | -         |

Abbreviations: CI, confidence interval; NPCR, National Program of Cancer Registries; NS, net survival; SEER, Surveillance, Epidemiology, and End Results program.  
<sup>a</sup> Stage at diagnosis is the SEER Summary Stage 2000 (SS2000). Information on stage was not available for 2 states (Maryland and Wisconsin) or for Rhode Island for cases diagnosed between 2004 and 2009. Unstandardized estimates are italicized.
